# Supplementary material for: Methylomic profiling of human brain tissue supports a neurodevelopmental origin for schizophrenia
Source: PubMed Central journal article supplement (PMC4262979; doi:10.1186/s13059-014-0483-2), 2014-10-28
Supplement: 13059_2014_483_MOESM1_ESM.pdf [file 13059_2014_483_MOESM1_ESM.pdf]

**SUPPLEMENTARY FIGURE 1** – Circos plot of schizophrenia-associated differentially methylated regions (DMRs) in the prefrontal cortex. The outermost ring denotes chromosomal location (annotated with chromosomal number), with the pter-qter orientation in a clockwise direction. Small red lines represent the centromeres within each chromosome. The middle ring highlights the location of genes associated with schizophrenia-associated DMRs (FDR  $\leq 0.05$ ), with the magnitude and direction of DNA methylation difference for each region shown in the inner ring. Lines pointed inwards signify hypomethylated regions and outwards hypermethylated regions. Line colors indicate the genomic region or CpG island location of the probe. TSS=Transcription start site; UTR=Untranslated Region.

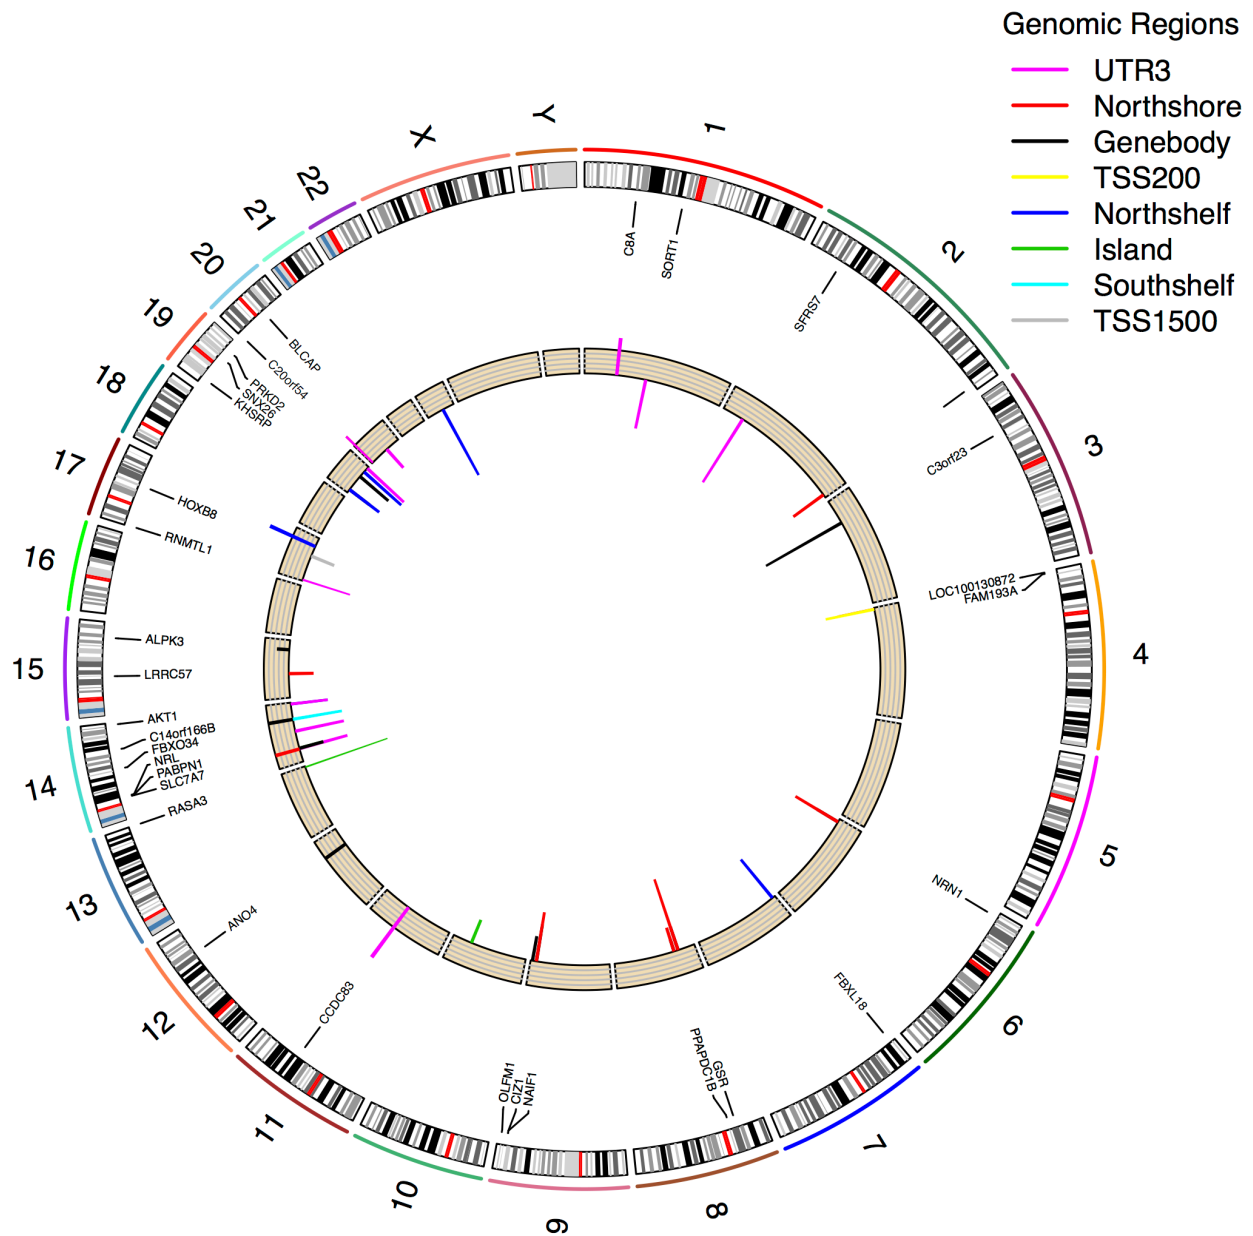

**SUPPLEMENTARY FIGURE 2 - Validation of Illumina 450K array data using bisulfite-pyrosequencing.** Shown is confirmation of schizophrenia-associated DNA methylation differences at a) cg23844013 (*C8A*), b) cg00565348 (*NRN1*), and c) cg24803255 (*RASA3*). Additional validation data is presented in **Figure 1c**.

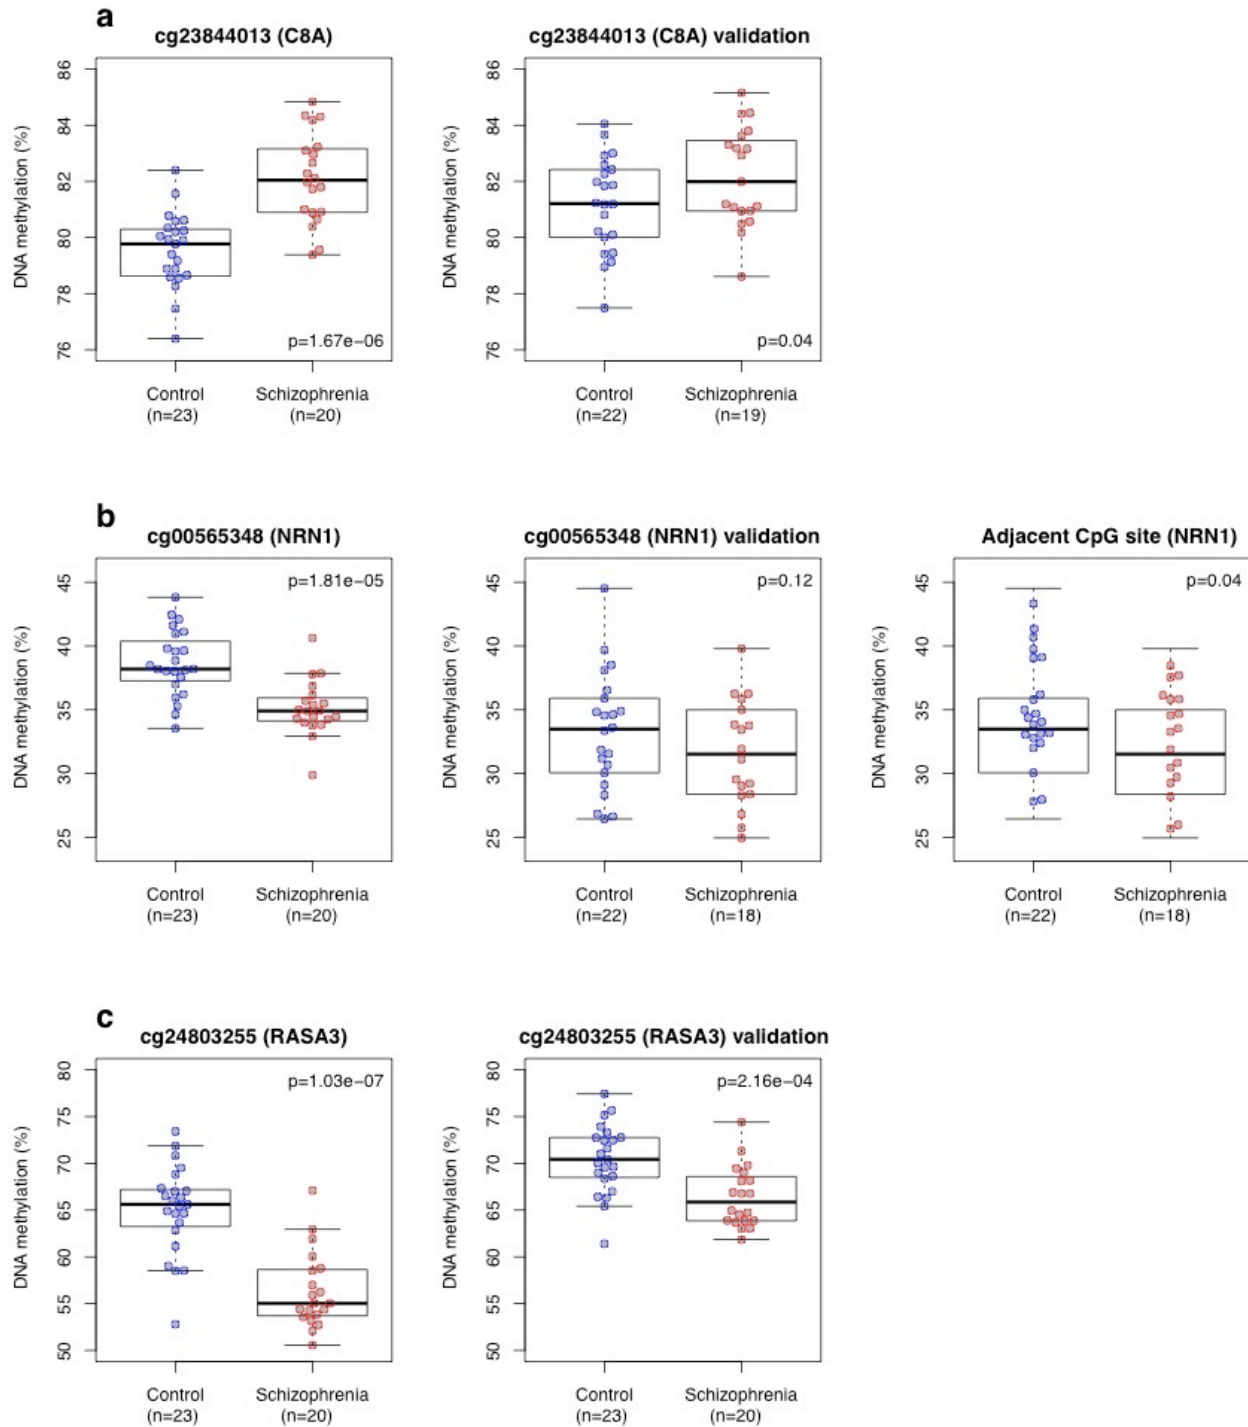

**SUPPLEMENTARY FIGURE 3 – Modules of co-methylated loci identified in the ‘discovery’ PFC cohort by WGCNA are strongly preserved in the Montreal replication cohort. A Zsummary score > 10 is indicative of a strongly preserved module. Of note, the two modules associated with schizophrenia are highly conserved across datasets (black module: Zsummary score = 190; pink module: Zsummary score = 49).**

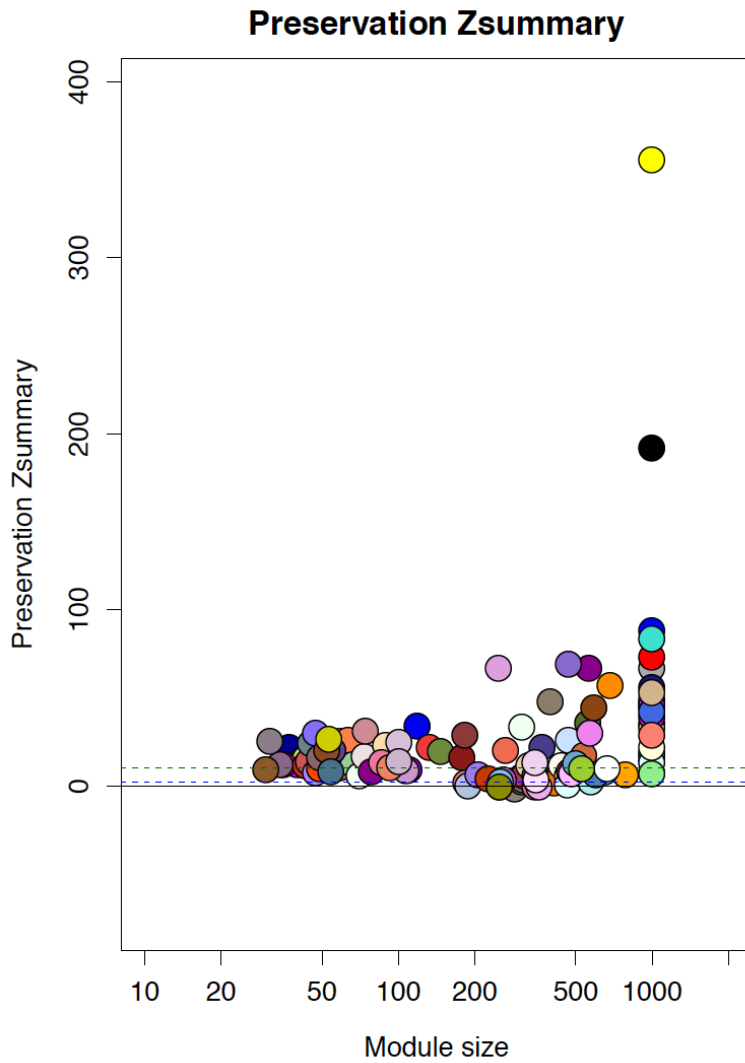

**SUPPLEMENTARY FIGURE 4 - Ingenuity Pathway Analysis highlighted a highly significant ( $p=3.80E-18$  to  $1.37E-03$ ) enrichment of pathways related to nervous system development and function in the black WGCNA module.**

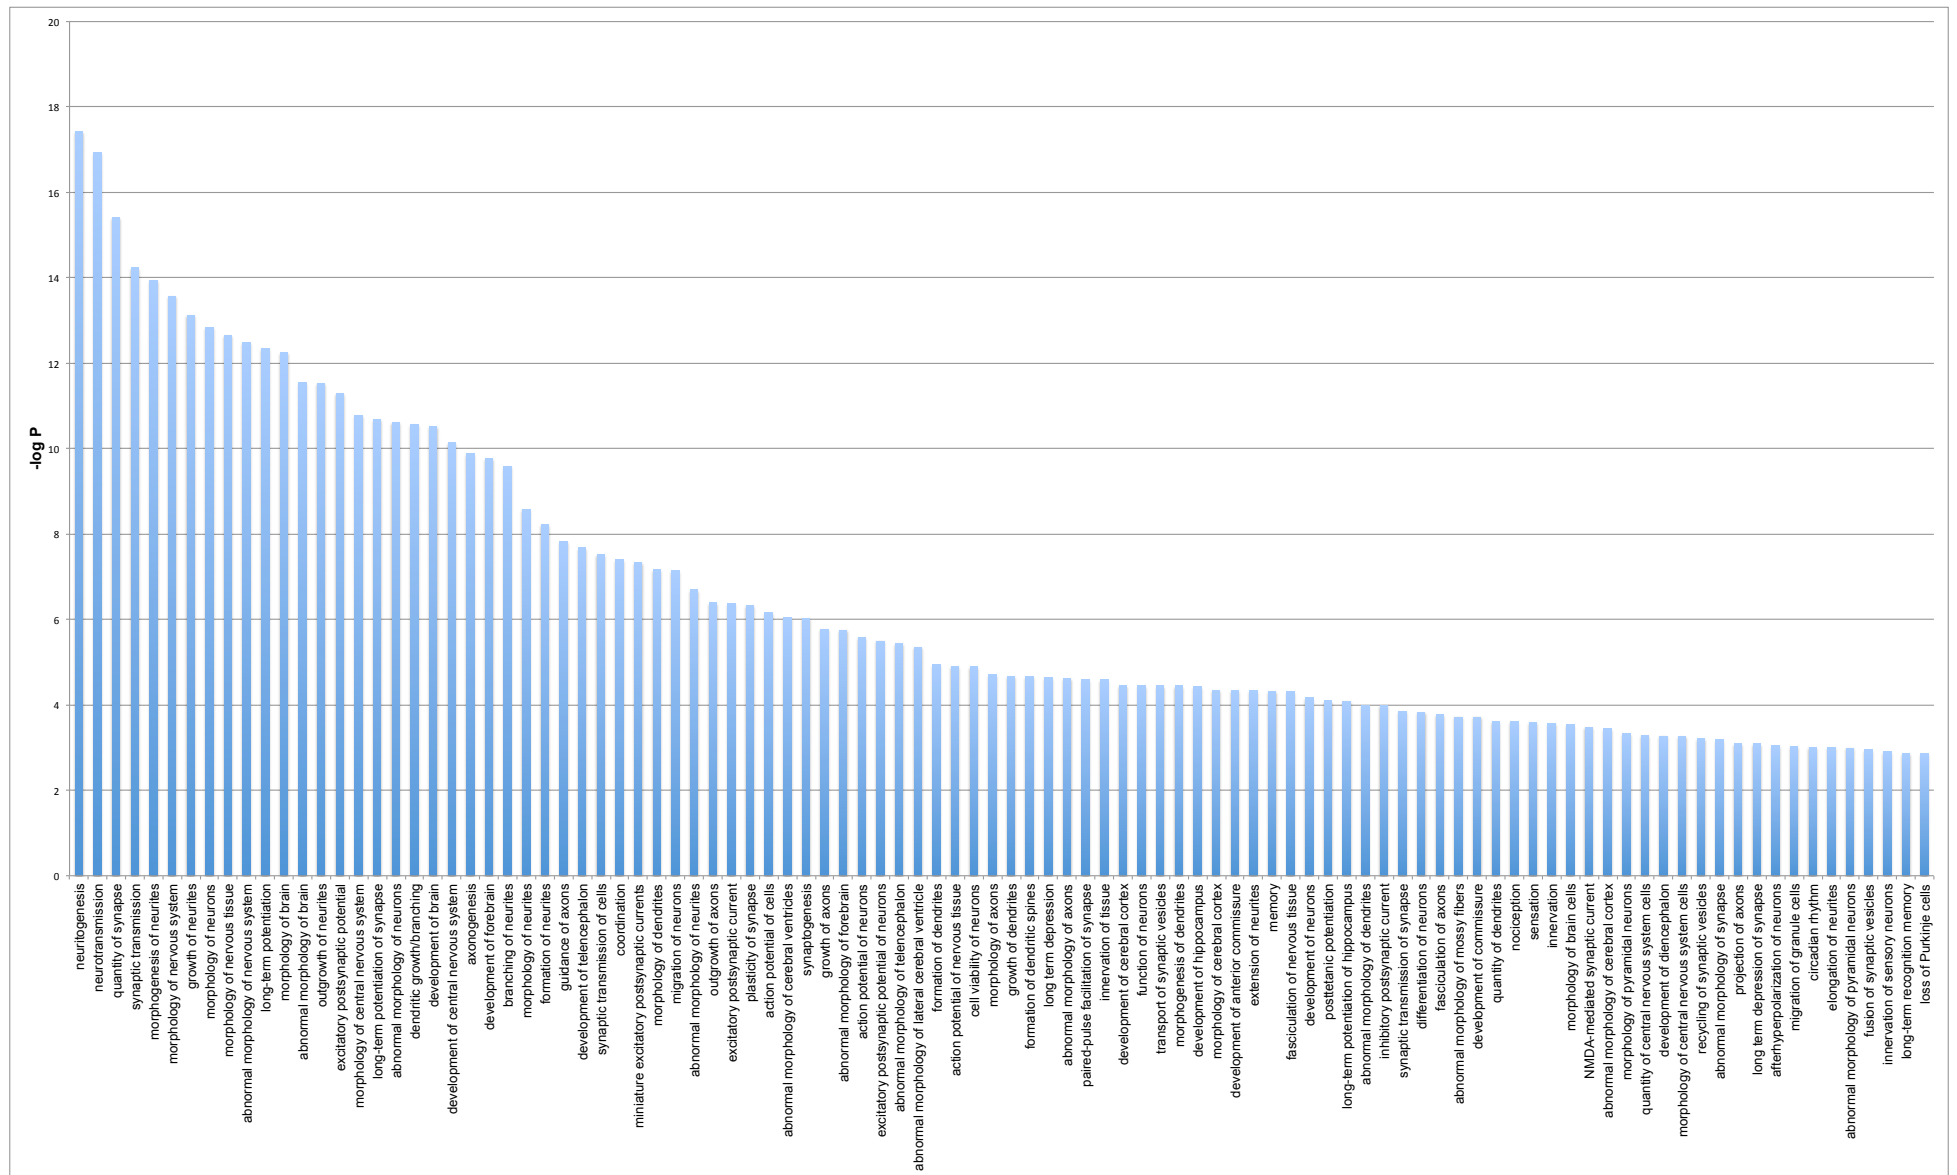

**SUPPLEMENTARY FIGURE 5 - Ingenuity Pathway Analysis highlighted a highly significant ( $p=4.04E-15$  to  $3.16E-03$ ) enrichment of pathways related to nervous system development and function in the pink WGCNA module.**

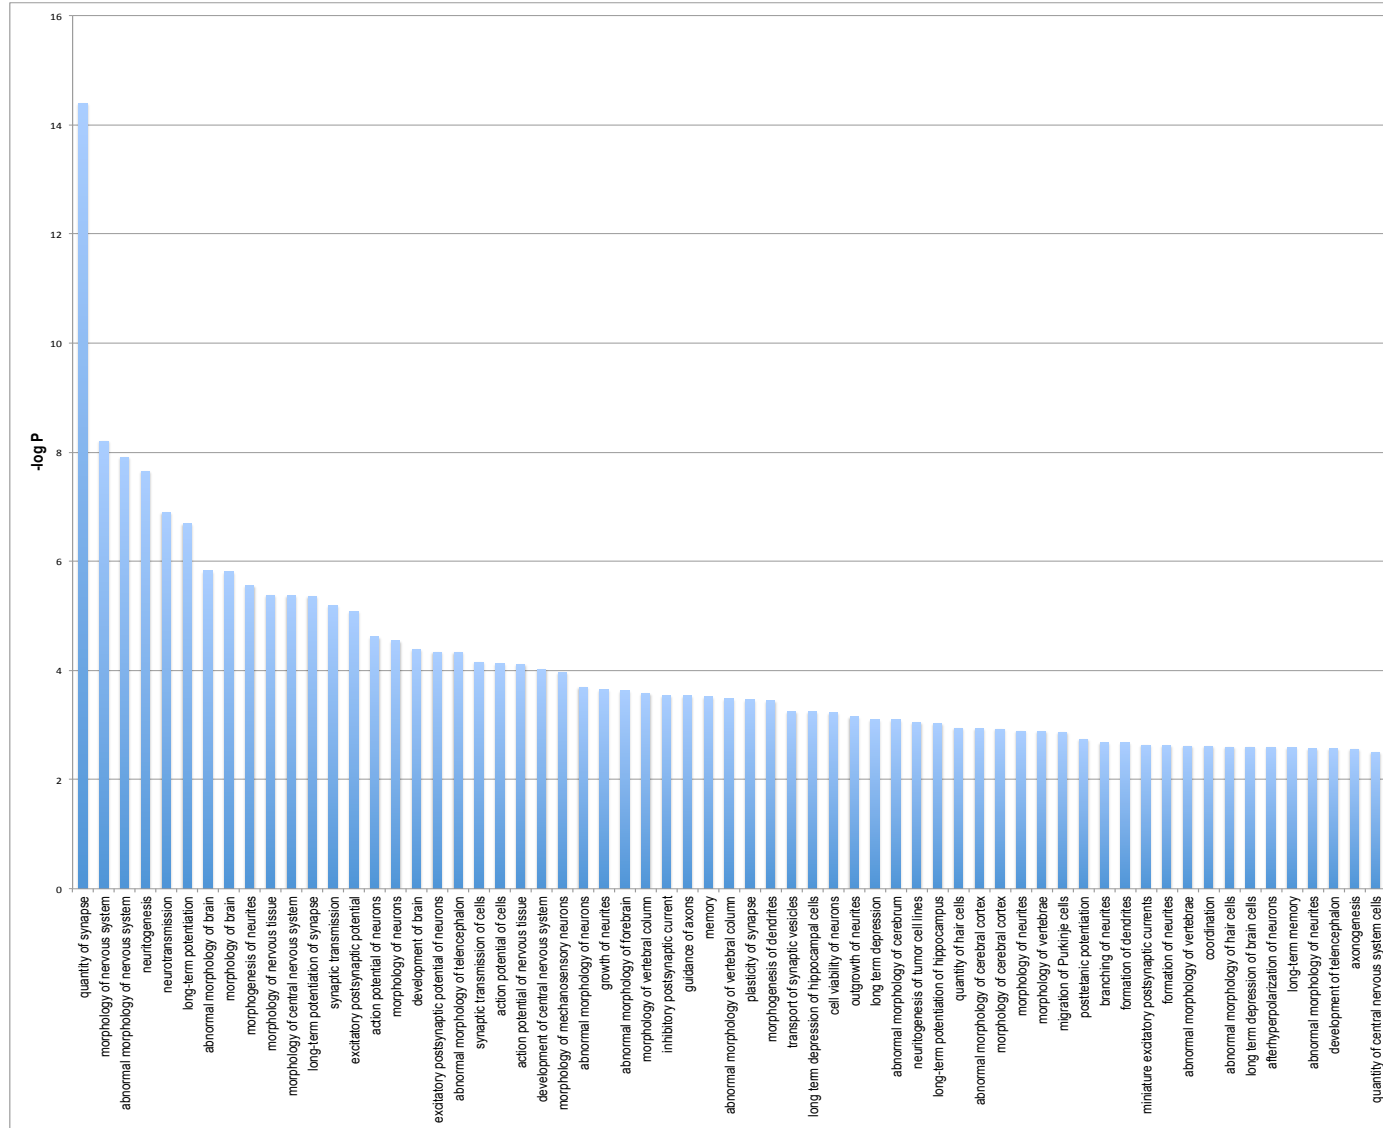

**SUPPLEMENTARY FIGURE 6 - Schizophrenia-associated DMPs are enriched for loci showing dynamic changes in DNA methylation during human brain development.** Correlation between DNA methylation and neurodevelopmental age (days post-conception) is shown for top-ranked schizophrenia-associated DMPs that are also associated with brain development (**Supplementary Table 13**).

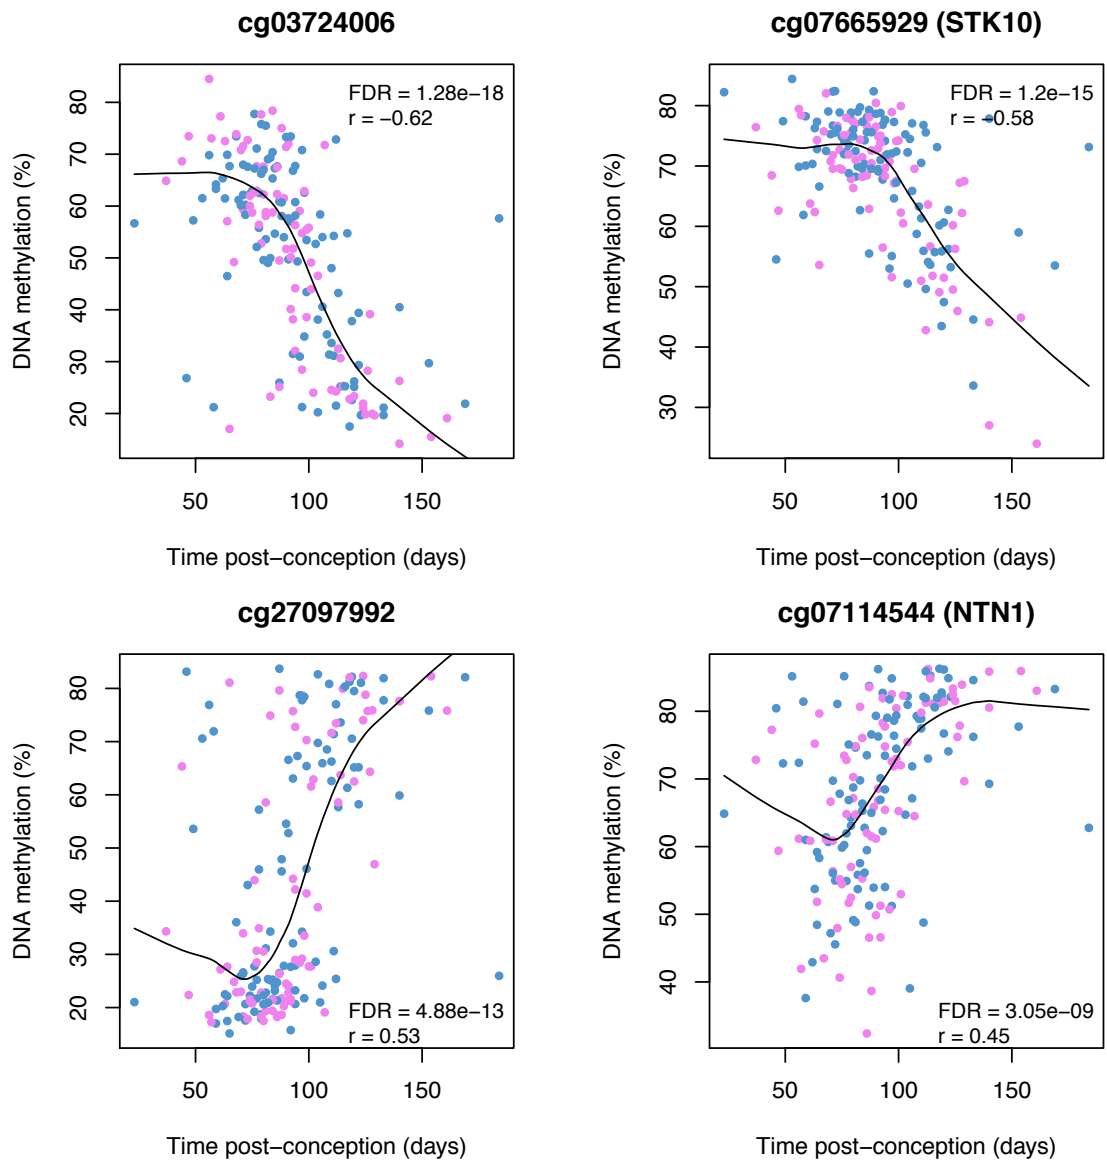

**cg00236305 (MYT1L)**

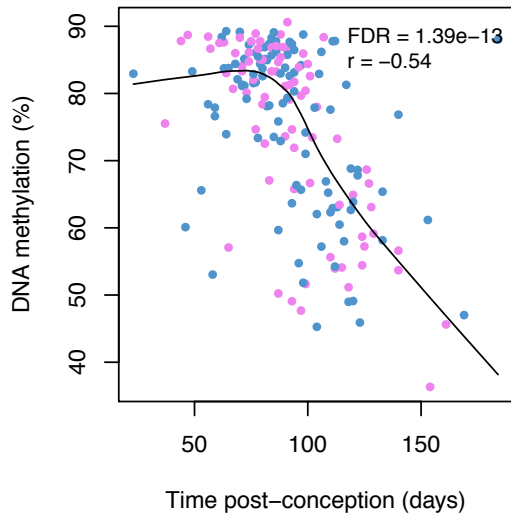

**cg25790133 (FAM193A)**

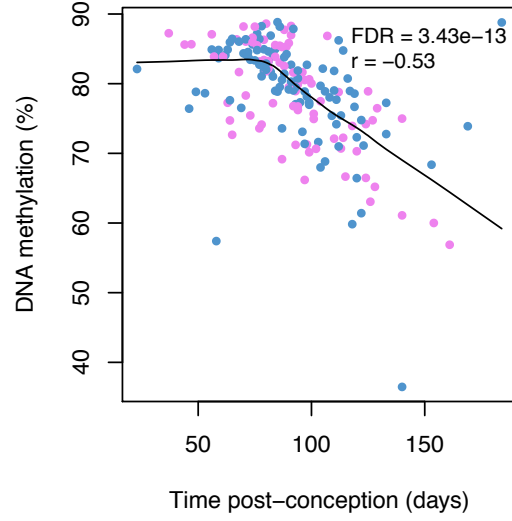

**cg03962217 (LOC202781)**

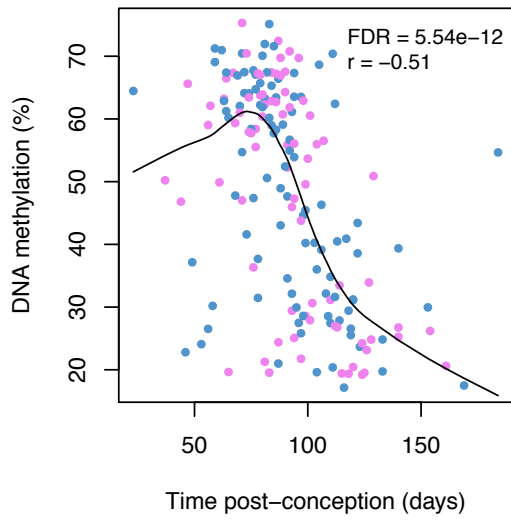

**cg17356733 (IFNGR2)**

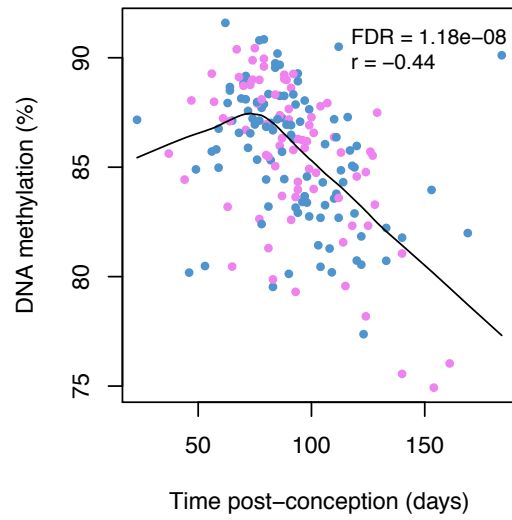

**SUPPLEMENTARY TABLE 1 - Details of post-mortem brain samples from London Brain Bank of Neurodegenerative Disease.** Schizophrenia cases and controls are matched (t-test p-value>0.05) for all variables except total brain weight. SZ=schizophrenia.

|                               | <b>SZ</b>   | <b>Control</b> | <b>Total</b> | <b>p-value</b> |
|-------------------------------|-------------|----------------|--------------|----------------|
| <b>Number</b>                 | 22          | 24             | 46           |                |
| <b>Sex (male:female)</b>      | 12:10       | 18:6           | 30:16        |                |
| <b>Age at death (years)</b>   | 61± 16.6    | 61.1 ± 18.9    | 61.1 ± 17.6  | 0.98           |
| <b>Total brain weight (g)</b> | 1354± 143   | 1465 ± 193     | 1416 ± 180   | 0.04**         |
| <b>Net brain weight (g)</b>   | 1215± 132   | 1292 ± 173     | 1260 ± 160   | 0.11           |
| <b>Cerebellum weight (g)</b>  | 164 ± 15.5  | 175 ± 28       | 171 ± 24     | 0.10           |
| <b>pH</b>                     | 6.60 ± 0.29 | 6.48 ± 0.33    | 6.54 ± 0.32  | 0.19           |



**SUPPLEMENTARY TABLE 2 - Details of individual post-mortem brain samples from the London Brain Bank of Neurodegenerative Disease. NA=not available.**

| ID                   | Sex | Age at death (years) | Total brain weight (g) | Net brain weight (g) | Cerebellum weight (g) | pH   |
|----------------------|-----|----------------------|------------------------|----------------------|-----------------------|------|
| <b>Schizophrenia</b> |     |                      |                        |                      |                       |      |
| ID1                  | M   | 67                   | 1487                   | 1313                 | 174                   | 6.36 |
| ID2                  | M   | 79                   | NA                     | NA                   | NA                    | 6.40 |
| ID3                  | F   | 69                   | NA                     | NA                   | NA                    | 6.80 |
| ID4                  | F   | 76                   | 1321                   | 1143                 | 178                   | 6.25 |
| ID5                  | F   | 84                   | 1201                   | NA                   | NA                    | 6.60 |
| ID6                  | M   | 87                   | 1126                   | 993                  | 133                   | 6.19 |
| ID7                  | F   | 32                   | 1356                   | 1185                 | 171                   | 6.30 |
| ID8                  | F   | 70                   | 1340                   | 1193                 | 147                   | 6.17 |
| ID9                  | F   | 49                   | 1535                   | 1354                 | 181                   | 6.90 |
| ID10                 | M   | 46                   | 1283                   | 1117                 | 166                   | 7.00 |
| ID11                 | M   | 62                   | 1614                   | 1439                 | 175                   | 7.00 |
| ID12                 | M   | 31                   | 1273                   | 1273                 | NA                    | 6.30 |
| ID13                 | M   | 51                   | 1663                   | 1485                 | 178                   | 6.80 |
| ID14                 | M   | 62                   | NA                     | NA                   | NA                    | 7.10 |
| ID15                 | F   | 34                   | 1237                   | 1092                 | 145                   | 6.20 |
| ID16                 | F   | 75                   | 1314                   | 1141                 | 173                   | 6.60 |
| ID17                 | M   | 64                   | 1239                   | NA                   | NA                    | 6.70 |
| ID18                 | M   | 49                   | 1263                   | 1097                 | 166                   | 6.80 |
| ID19                 | F   | 71                   | 1283                   | 1141                 | 142                   | 6.83 |
| ID20                 | F   | 75                   | 1310                   | 1162                 | 148                   | 6.61 |
| ID21                 | M   | 64                   | 1375                   | 1197                 | 178                   | 6.60 |
| ID22                 | M   | 45                   | 1499                   | 1332                 | 167                   | 6.70 |
| <b>Control</b>       |     |                      |                        |                      |                       |      |
| ID23                 | M   | 25                   | 1731                   | 1549                 | 182                   | 6.93 |
| ID24                 | M   | 49                   | 1411                   | 1231                 | 180                   | 6.70 |
| ID25                 | F   | 82                   | 1376                   | 1216                 | 160                   | 6.33 |
| ID26                 | F   | 68                   | 1196                   | 1052                 | 144                   | 6.02 |
| ID27                 | F   | 33                   | 1503                   | 1323                 | 180                   | 6.36 |
| ID28                 | M   | 50                   | 1857                   | 1650                 | 207                   | 6.49 |
| ID29                 | M   | 57                   | 1287                   | 1146                 | 141                   | 6.62 |
| ID30                 | M   | 58                   | 1364                   | 1145                 | 219                   | 6.87 |
| ID31                 | F   | 68                   | 1305                   | 1137                 | 168                   | 7.10 |
| ID32                 | M   | 71                   | 1606                   | 1356                 | 250                   | 6.38 |
| ID33                 | M   | 95                   | 1310                   | 1160                 | 150                   | 6.14 |
| ID34                 | M   | 40                   | 1458                   | 1286                 | 172                   | 6.13 |
| ID35                 | M   | 54                   | 1487                   | 1347                 | 140                   | 6.96 |
| ID36                 | F   | 76                   | 1329                   | 1175                 | 154                   | 6.41 |
| ID37                 | M   | 67                   | 1505                   | 1336                 | 169                   | 6.06 |
| ID38                 | F   | 96                   | 1263                   | 1115                 | 148                   | 6.55 |
| ID39                 | M   | 37                   | 1389                   | 1214                 | 175                   | 6.46 |
| ID40                 | M   | 40                   | 1670                   | 1470                 | 200                   | 6.80 |
| ID41                 | M   | 70                   | 1175                   | 1107                 | 136                   | 6.44 |
| ID42                 | M   | 69                   | 1943                   | 1739                 | 204                   | 6.60 |
| ID43                 | M   | 48                   | 1450                   | 1262                 | 188                   | 6.20 |
| ID44                 | M   | 80                   | 1488                   | 1300                 | 188                   | 6.04 |
| ID45                 | M   | 79                   | 1598                   | 1406                 | 192                   | 5.95 |
| ID46                 | M   | 55                   | 1452                   | 1288                 | 164                   | 6.90 |

**SUPPLEMENTARY TABLE 3 – Samples excluded during quality control (QC) for methylation assays.** Pyro=Pyrosequencing, BC=Bisulfite Conversion, PFC=Prefrontal cortex, CER=Cerebellum, NA=not available.

| ID                                 | PFC 450K Barcode  | PFC 450K QC | CER 450K Barcode  | CER 450K QC | PFC NRN1<br>Pyro | PFC C8A<br>Pyro | PFC RASA3<br>Pyro |
|------------------------------------|-------------------|-------------|-------------------|-------------|------------------|-----------------|-------------------|
| <i>Schizophrenia</i>               |                   |             |                   |             |                  |                 |                   |
| ID1                                | 6055432012_R04C02 |             | 6042316042_R03C01 |             |                  |                 |                   |
| ID2                                | 6055432012_R06C01 |             | 6042316047_R02C01 |             |                  |                 |                   |
| ID3                                | 6055432012_R01C02 |             | 6042316024_R06C02 |             |                  |                 |                   |
| ID4                                | 6055432012_R01C01 |             | 6042316042_R05C01 |             | Failed QC        | Failed QC       |                   |
| ID5                                | 6055432066_R02C01 |             | 6042316024_R03C01 |             |                  |                 |                   |
| ID6                                | 6055432029_R02C02 |             | 6042316031_R03C02 |             |                  |                 |                   |
| ID7                                | 6055432060_R03C01 |             | 6042316024_R04C01 |             |                  |                 |                   |
| ID8                                | 6055432012_R04C01 | Failed QC   | 6042316024_R04C02 |             | NA on 450K       | NA on 450K      | NA on 450K        |
| ID9                                | 6055432066_R01C02 |             | 6042316031_R05C02 |             |                  |                 |                   |
| ID10                               | 6055432060_R04C02 |             | 6042316024_R02C02 |             |                  |                 |                   |
| ID11                               | 6055432066_R05C02 |             | 6042316024_R02C01 |             |                  |                 |                   |
| ID12                               | 6055432012_R02C01 | Failed QC   | 6042316024_R01C01 |             | NA on 450K       | NA on 450K      | NA on 450K        |
| ID13                               | 6055432060_R05C02 |             | 6042316042_R05C02 |             |                  |                 |                   |
| ID14                               | 6055432066_R03C02 |             | 6042316031_R01C01 |             |                  |                 |                   |
| ID15                               | 6055432060_R03C02 |             | 6042316047_R03C02 |             |                  |                 |                   |
| ID16                               | 6055432029_R05C01 |             | 6042316031_R06C01 |             |                  |                 |                   |
| ID17                               | 6055432029_R04C01 |             | 6042316042_R04C02 |             |                  |                 |                   |
| ID18                               | 6055432060_R04C01 |             | 6042316031_R02C01 |             |                  |                 |                   |
| ID19                               | 6055432029_R03C02 |             | 6042316031_R04C02 |             |                  |                 |                   |
| ID20                               | 6055432012_R03C01 |             | 6042316024_R05C02 |             |                  |                 |                   |
| ID21                               | 6055432066_R04C02 |             | 6042316031_R02C02 |             |                  |                 |                   |
| ID22                               | 6055432066_R01C01 |             | 6042316024_R03C02 | Not CER     | Failed QC        |                 |                   |
| <i>Control</i>                     |                   |             |                   |             |                  |                 |                   |
| ID23                               | 6055432012_R06C02 |             | 6042316042_R01C02 |             |                  |                 |                   |
| ID24                               | 6055432012_R03C02 |             | 6042316031_R03C01 |             |                  |                 |                   |
| ID25                               | 6055432012_R05C01 |             | 6042316047_R06C01 |             |                  |                 |                   |
| ID26                               | 6055432060_R05C01 |             | 6042316024_R06C01 |             |                  |                 |                   |
| ID27                               | 6055432029_R02C01 |             | 6042316042_R06C02 |             |                  |                 |                   |
| ID28                               | 6055432066_R05C01 |             | 6042316047_R05C01 |             |                  |                 |                   |
| ID29                               | 6055432066_R04C01 |             | 6042316042_R02C02 |             |                  |                 |                   |
| ID30                               | 6055432012_R05C02 |             | 6042316031_R06C02 |             |                  |                 |                   |
| ID31                               | 6055432029_R03C01 |             | 6042316047_R05C02 |             |                  |                 |                   |
| ID32                               | 6055432012_R02C02 |             | 6042316024_R05C01 |             | Failed QC        | Failed QC       |                   |
| ID33                               | 6055432066_R02C02 |             | 6042316047_R04C02 |             |                  |                 |                   |
| ID34                               | 6055432066_R03C01 | Failed QC   | 6042316031_R01C02 |             | NA on 450K       | NA on 450K      | NA on 450K        |
| ID35                               | 6055432060_R02C02 |             | 6042316047_R04C01 |             |                  |                 |                   |
| ID36                               | 6055432060_R06C01 |             | 6042316042_R04C01 |             |                  |                 |                   |
| ID37                               | 6055432060_R01C01 |             | 6042316031_R05C01 |             |                  |                 |                   |
| ID38                               | 6055432060_R06C02 |             | 6042316031_R04C01 |             |                  |                 |                   |
| ID39                               | 6055432029_R01C02 |             | 6042316042_R03C02 |             |                  |                 |                   |
| ID40                               | 6055432029_R04C02 |             | 6042316042_R01C01 |             |                  |                 |                   |
| ID41                               | 6055432029_R05C02 |             | 6042316042_R02C01 |             |                  |                 |                   |
| ID42                               | 6055432060_R01C02 |             | 6042316024_R01C02 |             |                  |                 |                   |
| ID43                               | 6055432029_R06C01 |             | 6042316042_R06C01 |             |                  |                 |                   |
| ID44                               | 6055432060_R02C01 |             | 6042316047_R01C01 |             |                  |                 |                   |
| ID45                               | 6055432029_R06C02 |             | 6042316047_R02C02 |             |                  |                 |                   |
| ID46                               | 6055432029_R01C01 |             | 6042316047_R03C01 | Failed BC   |                  |                 |                   |
| <b>Total included in analysis:</b> |                   | <b>43</b>   |                   | <b>44</b>   | <b>40</b>        | <b>41</b>       | <b>43</b>         |

**SUPPLEMENTARY TABLE 4 – 100 top-ranked schizophrenia-associated DMPs in the prefrontal cortex.** P-value from linear model including age and sex as covariates. TSS=Transcription start site; UTR=Untranslated region, SZ=schizophrenia. The CETS algorithm<sup>1</sup> was used to correct for the potential effect of differential neuronal cell proportions across samples.

| Probe ID   | Genomic position (hg19) | Gene    | Gene region | Probe type | P        | FDR  | CETS-adjusted P | Mean SZ | Mean Control | Beta difference |
|------------|-------------------------|---------|-------------|------------|----------|------|-----------------|---------|--------------|-----------------|
| cg26173173 | chr8:144642813*         | GSDMD   | Body        | II         | 1.16E-07 | 0.03 | 2.76E-06        | 0.83    | 0.79         | 0.04            |
| cg24803255 | chr13:114807060         | RASA3   | Body        | II         | 1.25E-07 | 0.03 | 1.09E-05        | 0.56    | 0.65         | -0.09           |
| cg00903099 | chr7:154862441          | HTR5A   | TSS200      | II         | 2.40E-07 | 0.03 | 1.95E-05        | 0.09    | 0.12         | -0.02           |
| cg08171022 | chr11:70185278          | PPFIA1  | Body        | II         | 2.85E-07 | 0.03 | 2.93E-05        | 0.48    | 0.53         | -0.05           |
| cg02857643 | chr17:48696108          | CACNA1G | Body        | I          | 1.63E-06 | 0.1  | 5.88E-05        | 0.87    | 0.92         | -0.05           |
| cg00236305 | chr2:1796076            | MYT1L   | Body        | II         | 1.75E-06 | 0.1  | 1.95E-04        | 0.67    | 0.73         | -0.06           |
| cg14966346 | chr14:104152124         | KLC1    | Body        | II         | 2.51E-06 | 0.1  | 1.25E-04        | 0.72    | 0.77         | -0.05           |
| cg13079528 | chr7:4027346            | SDK1    | Body        | I          | 2.75E-06 | 0.1  | 3.07E-04        | 0.71    | 0.79         | -0.08           |
| cg14429765 | chr8:6492531            | MCPH1   | Body        | II         | 2.79E-06 | 0.1  | 2.94E-06        | 0.79    | 0.76         | 0.03            |
| cg08602214 | chr8:22864392           | RHOBTB2 | Body        | II         | 2.87E-06 | 0.1  | 1.76E-04        | 0.69    | 0.75         | -0.07           |
| cg19735533 | chr2:241196887          | -       | -           | II         | 2.94E-06 | 0.1  | 2.22E-04        | 0.76    | 0.81         | -0.06           |
| cg09507608 | chr22:29873338          | -       | -           | II         | 2.95E-06 | 0.1  | 2.88E-04        | 0.56    | 0.62         | -0.06           |
| cg23844013 | chr1:57383752           | C8A     | 3'UTR       | II         | 3.20E-06 | 0.1  | 4.07E-06        | 0.82    | 0.79         | 0.03            |
| cg26578910 | chr19:47204096          | PRKD2   | Body        | I          | 3.47E-06 | 0.1  | 3.43E-04        | 0.67    | 0.71         | -0.04           |
| cg21847368 | chr13:113744010         | MCF2L   | Body        | II         | 3.70E-06 | 0.1  | 3.08E-05        | 0.80    | 0.84         | -0.03           |
| cg03607729 | chr16:25138698          | LCMT1   | Body        | II         | 4.19E-06 | 0.1  | 4.38E-04        | 0.70    | 0.75         | -0.04           |
| cg10248981 | chr10:126157948         | LHPP    | Body        | I          | 4.32E-06 | 0.1  | 4.81E-04        | 0.55    | 0.63         | -0.07           |
| cg03445663 | chr2:242170236          | HDLBP   | Body        | I          | 4.59E-06 | 0.1  | 4.11E-04        | 0.51    | 0.59         | -0.08           |
| cg15079231 | chr3:42572745           | VIPR1   | Body        | II         | 4.93E-06 | 0.1  | 4.18E-04        | 0.76    | 0.80         | -0.04           |
| cg21341878 | chr4:2278462            | ZFYVE28 | Body        | II         | 5.14E-06 | 0.1  | 2.71E-04        | 0.75    | 0.81         | -0.05           |
| cg04922803 | chr12:104444418         | GLT8D2  | TSS1500     | II         | 5.19E-06 | 0.1  | 1.36E-04        | 0.68    | 0.62         | 0.06            |
| cg18857062 | chr6:43276478           | CRIP3   | Body        | I          | 5.29E-06 | 0.1  | 1.43E-04        | 0.21    | 0.26         | -0.04           |
| cg27138871 | chr11:74950396          | -       | -           | II         | 5.63E-06 | 0.11 | 6.10E-04        | 0.75    | 0.79         | -0.05           |
| cg27363226 | chr19:6421747           | KHSRP   | Body        | II         | 6.63E-06 | 0.12 | 7.06E-04        | 0.62    | 0.67         | -0.05           |
| cg02187259 | chr2:16804452           | FAM49A  | 5'UTR       | II         | 6.72E-06 | 0.12 | 7.22E-04        | 0.74    | 0.79         | -0.05           |

|                   |                 |                        |         |    |          |      |          |      |      |       |
|-------------------|-----------------|------------------------|---------|----|----------|------|----------|------|------|-------|
| <b>cg26182253</b> | chr13:112236782 | -                      | -       | II | 7.01E-06 | 0.12 | 7.68E-04 | 0.60 | 0.67 | -0.06 |
| <b>cg14370653</b> | chr9:137828210  | -                      | -       | II | 7.18E-06 | 0.12 | 8.07E-04 | 0.75 | 0.80 | -0.05 |
| <b>cg14527262</b> | chr4:1202653    | LOC100130<br>872-SPON2 | TSS200  | I  | 8.02E-06 | 0.12 | 8.77E-04 | 0.56 | 0.63 | -0.07 |
| <b>cg16393877</b> | chr17:65037838  | -                      | -       | II | 8.07E-06 | 0.12 | 2.52E-04 | 0.78 | 0.74 | 0.04  |
| <b>cg26130533</b> | chr4:1202700    | LOC100130<br>872-SPON2 | TSS200  | II | 8.92E-06 | 0.12 | 6.42E-04 | 0.57 | 0.63 | -0.06 |
| <b>cg05860371</b> | chr4:152931291  | -                      | -       | II | 9.10E-06 | 0.12 | 1.02E-03 | 0.63 | 0.69 | -0.06 |
| <b>cg03363012</b> | chr20:741049    | C20orf54               | 3'UTR   | II | 9.22E-06 | 0.12 | 4.94E-04 | 0.84 | 0.81 | 0.03  |
| <b>cg21609813</b> | chr8:22004881   | LGI3                   | 3'UTR   | I  | 9.89E-06 | 0.12 | 6.72E-04 | 0.77 | 0.73 | 0.04  |
| <b>cg27608031</b> | chr16:77353824  | ADAMTS18               | Body    | II | 1.00E-05 | 0.12 | 1.46E-04 | 0.73 | 0.68 | 0.04  |
| <b>cg21390682</b> | chr13:113743751 | MCF2L                  | Body    | II | 1.01E-05 | 0.12 | 1.13E-03 | 0.68 | 0.73 | -0.05 |
| <b>cg27654476</b> | chr14:77503345  | -                      | -       | II | 1.03E-05 | 0.12 | 3.98E-04 | 0.64 | 0.68 | -0.04 |
| <b>cg20930320</b> | chr1:109852598  | SORT1                  | 3'UTR   | II | 1.04E-05 | 0.12 | 3.86E-05 | 0.59 | 0.64 | -0.04 |
| <b>cg12864185</b> | chr1:240160972  | -                      | -       | II | 1.07E-05 | 0.12 | 4.22E-05 | 0.17 | 0.22 | -0.05 |
| <b>cg13119928</b> | chr12:53228661  | KRT79                  | TSS1500 | II | 1.13E-05 | 0.12 | 4.67E-04 | 0.81 | 0.78 | 0.03  |
| <b>cg20681783</b> | chr5:8839868    | -                      | -       | I  | 1.14E-05 | 0.12 | 1.04E-03 | 0.38 | 0.33 | 0.05  |
| <b>cg07114544</b> | chr17:9110369   | NTN1                   | Body    | II | 1.15E-05 | 0.12 | 4.55E-04 | 0.73 | 0.69 | 0.04  |
| <b>cg09419102</b> | chr11:65550444  | -                      | -       | II | 1.15E-05 | 0.12 | 4.70E-04 | 0.70 | 0.66 | 0.04  |
| <b>cg25778661</b> | chr19:56031373  | -                      | -       | II | 1.20E-05 | 0.12 | 1.04E-03 | 0.79 | 0.84 | -0.05 |
| <b>cg13280041</b> | chr6:138866865  | NHSL1                  | Body    | I  | 1.22E-05 | 0.12 | 1.38E-03 | 0.31 | 0.26 | 0.05  |
| <b>cg14772639</b> | chr2:128711564  | SAP130                 | Body    | II | 1.28E-05 | 0.12 | 1.22E-03 | 0.79 | 0.74 | 0.04  |
| <b>cg09942424</b> | chr17:74913419  | MGAT5B                 | Body    | II | 1.35E-05 | 0.12 | 1.46E-03 | 0.78 | 0.82 | -0.04 |
| <b>cg04691233</b> | chr11:133989435 | JAM3                   | Body    | II | 1.37E-05 | 0.12 | 1.46E-03 | 0.84 | 0.80 | 0.04  |
| <b>cg07500432</b> | chr18:77918588  | PARD6G                 | Body    | II | 1.37E-05 | 0.12 | 1.15E-05 | 0.81 | 0.71 | 0.11  |
| <b>cg03991188</b> | chr7:98870835   | MYH16                  | TSS200  | II | 1.41E-05 | 0.12 | 6.29E-05 | 0.82 | 0.78 | 0.04  |
| <b>cg21843517</b> | chr12:123950174 | SNRNP35                | Body    | II | 1.41E-05 | 0.12 | 1.23E-04 | 0.83 | 0.79 | 0.04  |
| <b>cg12198176</b> | chr22:23415316  | RTDR1                  | Body    | II | 1.46E-05 | 0.12 | 1.58E-03 | 0.63 | 0.68 | -0.05 |
| <b>cg19643441</b> | chr19:19417142  | SF4                    | Body    | II | 1.53E-05 | 0.12 | 2.85E-04 | 0.80 | 0.83 | -0.03 |
| <b>cg07289133</b> | chr16:85147146  | FAM92B                 | TSS1500 | II | 1.54E-05 | 0.12 | 1.30E-03 | 0.74 | 0.69 | 0.05  |
| <b>cg11945824</b> | chr6:32116963   | PRRT1                  | 3'UTR   | I  | 1.54E-05 | 0.12 | 1.24E-03 | 0.58 | 0.64 | -0.06 |

|                   |                 |          |         |    |          |      |          |      |      |       |
|-------------------|-----------------|----------|---------|----|----------|------|----------|------|------|-------|
| <b>cg20011075</b> | chr1:4008090    | -        | -       | I  | 1.69E-05 | 0.13 | 1.92E-03 | 0.62 | 0.69 | -0.07 |
| <b>cg14752965</b> | chr17:17579346  | -        | -       | II | 1.72E-05 | 0.13 | 1.88E-03 | 0.75 | 0.80 | -0.05 |
| <b>cg07421682</b> | chr15:102030850 | PCSK6    | TSS1500 | II | 1.81E-05 | 0.13 | 1.94E-03 | 0.76 | 0.82 | -0.05 |
| <b>cg22697364</b> | chr5:32709859   | -        | -       | II | 1.85E-05 | 0.13 | 1.67E-03 | 0.26 | 0.22 | 0.04  |
| <b>cg25790133</b> | chr4:2627014    | FAM193A  | TSS200  | II | 1.89E-05 | 0.13 | 2.06E-03 | 0.51 | 0.57 | -0.06 |
| <b>cg10622536</b> | chr1:36771021   | C1orf113 | TSS1500 | II | 1.90E-05 | 0.13 | 1.81E-03 | 0.77 | 0.81 | -0.04 |
| <b>cg01936649</b> | chr6:164062746  | -        | -       | II | 1.92E-05 | 0.13 | 1.85E-03 | 0.76 | 0.82 | -0.06 |
| <b>cg07665929</b> | chr5:171523225  | STK10    | Body    | II | 1.97E-05 | 0.13 | 2.23E-03 | 0.59 | 0.66 | -0.07 |
| <b>cg21375204</b> | chr7:73752935   | CLIP2    | Body    | I  | 2.02E-05 | 0.13 | 2.19E-03 | 0.75 | 0.80 | -0.05 |
| <b>cg23203234</b> | chr8:103751623  | -        | -       | II | 2.02E-05 | 0.13 | 2.01E-03 | 0.71 | 0.76 | -0.05 |
| <b>cg04215055</b> | chr17:74911520  | MGAT5B   | Body    | I  | 2.03E-05 | 0.13 | 2.12E-03 | 0.65 | 0.71 | -0.06 |
| <b>cg06168875</b> | chr19:13988438  | NANOS3   | 1stExon | II | 2.06E-05 | 0.13 | 4.21E-04 | 0.76 | 0.82 | -0.06 |
| <b>cg24079702</b> | chr2:106015771  | FHL2     | TSS200  | I  | 2.08E-05 | 0.13 | 1.80E-03 | 0.17 | 0.21 | -0.04 |
| <b>cg25900150</b> | chr8:144601851  | ZC3H3    | Body    | I  | 2.11E-05 | 0.13 | 1.84E-04 | 0.81 | 0.89 | -0.07 |
| <b>cg27097992</b> | chr14:104800950 | -        | -       | I  | 2.15E-05 | 0.14 | 2.44E-03 | 0.66 | 0.54 | 0.12  |
| <b>cg22060153</b> | chr2:101889653  | SNORD89  | TSS200  | II | 2.22E-05 | 0.14 | 4.21E-04 | 0.68 | 0.72 | -0.04 |
| <b>cg23996071</b> | chr1:60280809   | HOOK1    | 1stExon | II | 2.25E-05 | 0.14 | 4.48E-04 | 0.18 | 0.22 | -0.04 |
| <b>cg07815131</b> | chr6:99289733   | -        | -       | II | 2.27E-05 | 0.14 | 2.17E-04 | 0.39 | 0.44 | -0.06 |
| <b>cg05583087</b> | chr3:12894947   | -        | -       | II | 2.30E-05 | 0.14 | 2.65E-03 | 0.46 | 0.51 | -0.06 |
| <b>cg03724006</b> | chr11:62790783  | -        | -       | II | 2.36E-05 | 0.14 | 2.66E-03 | 0.48 | 0.54 | -0.06 |
| <b>cg10535500</b> | chr6:33398610   | SYNGAP1  | Body    | II | 2.39E-05 | 0.14 | 4.76E-04 | 0.43 | 0.47 | -0.04 |
| <b>cg09235936</b> | chr2:242170211  | HDLBP    | Body    | I  | 2.41E-05 | 0.14 | 2.73E-03 | 0.68 | 0.74 | -0.06 |
| <b>cg12473775</b> | chr11:66824650  | RHOD     | Body    | II | 2.48E-05 | 0.14 | 3.09E-04 | 0.72 | 0.68 | 0.04  |
| <b>cg27252696</b> | chr6:100912940  | SIM1     | TSS1500 | I  | 2.51E-05 | 0.14 | 8.59E-05 | 0.07 | 0.09 | -0.01 |
| <b>cg00172872</b> | chr12:89461426  | -        | -       | II | 2.60E-05 | 0.14 | 2.42E-03 | 0.77 | 0.82 | -0.04 |
| <b>cg07780199</b> | chr19:18830892  | CRTC1    | Body    | II | 2.69E-05 | 0.14 | 3.06E-03 | 0.73 | 0.77 | -0.05 |
| <b>cg19671331</b> | chr8:143509438  | -        | -       | I  | 2.70E-05 | 0.14 | 2.13E-03 | 0.72 | 0.80 | -0.08 |
| <b>cg26925590</b> | chr16:139752    | C16orf35 | Body    | I  | 2.73E-05 | 0.14 | 1.43E-03 | 0.85 | 0.90 | -0.05 |
| <b>cg02064366</b> | chr17:79045526  | BAIAP2   | Body    | I  | 2.79E-05 | 0.14 | 3.20E-03 | 0.62 | 0.67 | -0.05 |
| <b>cg17244485</b> | chr2:103443515  | -        | -       | II | 2.83E-05 | 0.14 | 1.58E-03 | 0.38 | 0.32 | 0.05  |

|                   |                 |           |         |    |          |      |          |      |      |       |
|-------------------|-----------------|-----------|---------|----|----------|------|----------|------|------|-------|
| <b>cg23236908</b> | chr14:55819305  | FBXO34    | 3'UTR   | II | 2.89E-05 | 0.14 | 3.26E-03 | 0.77 | 0.81 | -0.04 |
| <b>cg03962217</b> | chr7:154796431  | LOC202781 | Body    | II | 2.90E-05 | 0.14 | 1.64E-03 | 0.65 | 0.69 | -0.05 |
| <b>cg17356733</b> | chr21:34774627  | IFNGR2    | TSS1500 | II | 2.93E-05 | 0.14 | 3.33E-03 | 0.64 | 0.70 | -0.06 |
| <b>cg16040341</b> | chr15:83544284  | HOMER2    | Body    | II | 2.93E-05 | 0.14 | 2.13E-03 | 0.69 | 0.75 | -0.05 |
| <b>cg24038762</b> | chr1:87817476   | -         | -       | II | 2.95E-05 | 0.14 | 3.40E-03 | 0.73 | 0.77 | -0.04 |
| <b>cg05529091</b> | chr12:111475875 | CUX2      | Body    | II | 2.99E-05 | 0.14 | 3.25E-03 | 0.65 | 0.70 | -0.05 |
| <b>cg05374733</b> | chr12:42853791  | PRICKLE1  | Body    | II | 3.00E-05 | 0.14 | 7.73E-06 | 0.80 | 0.83 | -0.03 |
| <b>cg06746318</b> | chr7:101755186  | CUX1      | Body    | I  | 3.04E-05 | 0.14 | 3.45E-03 | 0.70 | 0.76 | -0.06 |
| <b>cg08404546</b> | chr22:37910993  | CARD10    | Body    | II | 3.07E-05 | 0.14 | 5.98E-04 | 0.76 | 0.82 | -0.05 |
| <b>cg14905600</b> | chr10:134226361 | PWWP2B    | 3'UTR   | I  | 3.07E-05 | 0.14 | 1.13E-03 | 0.75 | 0.81 | -0.06 |
| <b>cg10976478</b> | chr2:241263838  | -         | -       | II | 3.20E-05 | 0.14 | 3.59E-06 | 0.84 | 0.80 | 0.04  |
| <b>cg21399807</b> | chr2:54955581   | EML6      | Body    | II | 3.22E-05 | 0.14 | 2.58E-03 | 0.74 | 0.78 | -0.04 |
| <b>cg21776682</b> | chr8:1387801    | -         | -       | II | 3.22E-05 | 0.14 | 3.73E-03 | 0.68 | 0.73 | -0.05 |
| <b>cg26593722</b> | chr16:87376314  | FBXO31    | Body    | I  | 3.28E-05 | 0.14 | 1.37E-03 | 0.80 | 0.85 | -0.05 |
| <b>cg04543233</b> | chr20:21689105  | PAX1      | Body    | II | 3.30E-05 | 0.14 | 6.38E-04 | 0.16 | 0.19 | -0.04 |
| <b>cg06614697</b> | chr1:3696285    | -         | -       | II | 3.32E-05 | 0.14 | 3.90E-04 | 0.62 | 0.67 | -0.05 |

<sup>1</sup>Guintivano, J., Aryee, M. J. & Kaminsky, Z. A. *Epigenetics* 8, 290-302,(2013).

**SUPPLEMENTARY TABLE 5 – 100 top-ranked schizophrenia-associated DMPs in the cerebellum.** The CETS algorithm<sup>1</sup> was used to correct for the potential effect of differential neuronal cell proportions across samples.  
TSS=Transcription start site; UTR=Untranslated region, SZ=schizophrenia.

| Probe ID   | Genomic position (hg19) | Gene       | Gene region | Probe type | P        | FDR  | CETS-adjusted P | Mean SZ | Mean Control | Beta difference |
|------------|-------------------------|------------|-------------|------------|----------|------|-----------------|---------|--------------|-----------------|
| cg05695876 | chr1:201665422          | NAV1       | Body        | II         | 1.87E-07 | 0.08 | 2.88E-07        | 0.12    | 0.17         | -0.04           |
| cg05388069 | chr16:3284378           | ZNF200     | 5'UTR       | II         | 6.26E-06 | 0.97 | 9.91E-06        | 0.65    | 0.59         | 0.07            |
| cg07208077 | chr12:11081755          | PRH2       | TSS200      | II         | 1.06E-05 | 0.97 | 2.18E-05        | 0.84    | 0.79         | 0.04            |
| cg13941830 | chr1:50891341           | -          | -           | II         | 1.18E-05 | 0.97 | 1.81E-05        | 0.29    | 0.22         | 0.06            |
| cg00560072 | chr1:61750543           | NFIA       | Body        | II         | 1.35E-05 | 0.97 | 3.72E-05        | 0.25    | 0.29         | -0.04           |
| cg13299148 | chr1:32170433           | COL16A1    | TSS1500     | II         | 1.72E-05 | 0.97 | 4.19E-05        | 0.84    | 0.77         | 0.07            |
| cg05922563 | chr17:40611593          | ATP6V0A1   | 5'UTR       | II         | 1.91E-05 | 0.97 | 5.83E-05        | 0.10    | 0.12         | -0.02           |
| cg01655427 | chr4:109091059          | LEF1       | TSS1500     | II         | 2.02E-05 | 0.97 | 2.35E-05        | 0.27    | 0.32         | -0.05           |
| cg07236939 | chr6:110722253          | DDO        | Body        | II         | 2.12E-05 | 0.97 | 5.19E-05        | 0.89    | 0.86         | 0.03            |
| cg16487621 | chr6:29395657           | OR11A1     | TSS200      | II         | 2.26E-05 | 0.97 | 4.44E-05        | 0.89    | 0.86         | 0.04            |
| cg15686782 | chr7:2143886            | MAD1L1     | Body        | II         | 2.65E-05 | 0.99 | 7.89E-05        | 0.83    | 0.78         | 0.05            |
| cg00499539 | chr2:113960266          | PSD4       | 3'UTR       | II         | 2.83E-05 | 0.99 | 8.32E-05        | 0.67    | 0.61         | 0.06            |
| cg20863949 | chr2:71213618           | TEX261     | 3'UTR       | II         | 3.10E-05 | 0.99 | 3.29E-05        | 0.82    | 0.75         | 0.06            |
| cg19895047 | chr8:19460197           | CSGALNACT1 | TSS200      | II         | 3.37E-05 | 0.99 | 9.44E-05        | 0.24    | 0.28         | -0.04           |
| cg22240880 | chr17:7466821           | SENP3      | Body        | I          | 3.47E-05 | 0.99 | 9.64E-05        | 0.80    | 0.76         | 0.04            |
| cg14213430 | chr7:157190333          | DNAJB6     | Body        | II         | 4.12E-05 | 1    | 1.06E-04        | 0.17    | 0.23         | -0.06           |
| cg18163452 | chr1:63466707           | -          | -           | II         | 4.24E-05 | 1    | 7.50E-05        | 0.69    | 0.76         | -0.07           |
| cg05187193 | chr6:168397037          | -          | -           | II         | 4.32E-05 | 1    | 9.33E-05        | 0.79    | 0.70         | 0.09            |
| cg16239296 | chr15:83736925          | BTBD1      | TSS1500     | II         | 5.46E-05 | 1    | 3.31E-05        | 0.88    | 0.85         | 0.03            |
| cg22849543 | chr20:46997755          | LOC284749  | Body        | II         | 5.46E-05 | 1    | 1.46E-04        | 0.12    | 0.15         | -0.02           |
| cg03506193 | chr8:104033864          | ATP6V1C1   | 5'UTR       | II         | 5.52E-05 | 1    | 1.06E-04        | 0.31    | 0.38         | -0.08           |
| cg25836061 | chr22:19939028          | COMT       | 5'UTR       | I          | 5.65E-05 | 1    | 1.51E-04        | 0.13    | 0.19         | -0.06           |
| cg19421752 | chr5:1225224            | SLC6A19    | 3'UTR       | II         | 5.83E-05 | 1    | 1.42E-04        | 0.76    | 0.81         | -0.05           |
| cg02398342 | chr17:80708632          | TBCD       | TSS1500     | II         | 6.25E-05 | 1    | 4.25E-05        | 0.72    | 0.59         | 0.13            |
| cg14044120 | chr9:139949577          | ENTPD2     | TSS1500     | II         | 6.56E-05 | 1    | 8.69E-05        | 0.82    | 0.79         | 0.03            |

|                   |                     |         |         |    |          |   |          |      |      |       |
|-------------------|---------------------|---------|---------|----|----------|---|----------|------|------|-------|
| <b>cg02294302</b> | chr1:47906276       | FOXD2   | 3'UTR   | II | 7.23E-05 | 1 | 1.13E-04 | 0.76 | 0.71 | 0.05  |
| <b>cg23466059</b> | chr18:56422682      | -       | -       | II | 7.27E-05 | 1 | 1.78E-04 | 0.11 | 0.15 | -0.04 |
| <b>cg21196747</b> | chr6:27521385       | -       | -       | II | 7.42E-05 | 1 | 2.05E-04 | 0.16 | 0.21 | -0.05 |
| <b>cg12728623</b> | chr22:19938992      | COMT    | 5'UTR   | II | 7.79E-05 | 1 | 1.30E-04 | 0.13 | 0.19 | -0.06 |
| <b>cg06855567</b> | chr4:177117009      | SPATA4  | TSS200  | II | 8.29E-05 | 1 | 1.51E-04 | 0.12 | 0.15 | -0.03 |
| <b>cg03812681</b> | chr6:1397366        | -       | -       | II | 8.37E-05 | 1 | 1.85E-04 | 0.20 | 0.23 | -0.03 |
| <b>cg03916014</b> | chr16:1722352       | CRAMP1L | Body    | II | 8.54E-05 | 1 | 9.53E-05 | 0.87 | 0.82 | 0.05  |
| <b>cg17381305</b> | chr6:133226489      | -       | -       | II | 8.64E-05 | 1 | 1.29E-04 | 0.78 | 0.73 | 0.05  |
| <b>cg15384717</b> | chr1:150294084      | PRPF3   | 5'UTR   | II | 9.22E-05 | 1 | 1.31E-04 | 0.17 | 0.19 | -0.02 |
| <b>cg16671988</b> | chr7:148963796      | ZNF783  | Body    | II | 9.76E-05 | 1 | 8.23E-05 | 0.82 | 0.78 | 0.04  |
| <b>cg17468663</b> | chr1:19048930       | PAX7    | Body    | II | 9.81E-05 | 1 | 1.43E-04 | 0.86 | 0.83 | 0.03  |
| <b>cg02048613</b> | chr2:161343862      | RBMS1   | Body    | II | 1.01E-04 | 1 | 1.81E-04 | 0.73 | 0.78 | -0.06 |
| <b>cg13137809</b> | chr7:2768988        | GNA12   | 3'UTR   | I  | 1.02E-04 | 1 | 2.97E-04 | 0.82 | 0.78 | 0.04  |
| <b>cg09890930</b> | chr12:56149396      | SARNP   | Body    | II | 1.03E-04 | 1 | 2.67E-04 | 0.68 | 0.74 | -0.06 |
| <b>cg02283487</b> | chr14:20904020      | KLHL33  | TSS1500 | II | 1.05E-04 | 1 | 3.03E-04 | 0.67 | 0.61 | 0.06  |
| <b>cg18951674</b> | chr11:93641499      | -       | -       | I  | 1.13E-04 | 1 | 2.63E-04 | 0.92 | 0.94 | -0.02 |
| <b>cg01758993</b> | chr20:44993436      | SLC35C2 | TSS1500 | II | 1.14E-04 | 1 | 7.03E-05 | 0.19 | 0.23 | -0.04 |
| <b>cg18308233</b> | chr11:12047017<br>9 | -       | -       | II | 1.19E-04 | 1 | 2.53E-04 | 0.87 | 0.83 | 0.04  |
| <b>cg03723001</b> | chr12:11714768<br>1 | -       | -       | II | 1.21E-04 | 1 | 3.52E-04 | 0.22 | 0.28 | -0.06 |
| <b>cg04162223</b> | chr13:11416420<br>7 | TMCO3   | Body    | II | 1.23E-04 | 1 | 3.62E-04 | 0.68 | 0.65 | 0.03  |
| <b>cg11947857</b> | chr19:1411919       | DAZAP1  | Body    | II | 1.24E-04 | 1 | 2.50E-04 | 0.09 | 0.11 | -0.02 |
| <b>cg06841648</b> | chr16:85479053      | -       | -       | II | 1.26E-04 | 1 | 2.15E-04 | 0.15 | 0.19 | -0.04 |
| <b>cg23667707</b> | chr7:152569949      | -       | -       | I  | 1.27E-04 | 1 | 1.30E-04 | 0.87 | 0.90 | -0.03 |
| <b>cg25240172</b> | chr2:62435157       | B3GNT2  | 5'UTR   | II | 1.28E-04 | 1 | 2.47E-04 | 0.84 | 0.83 | 0.02  |
| <b>cg26894575</b> | chr1:153518054      | S100A4  | 5'UTR   | II | 1.29E-04 | 1 | 5.40E-05 | 0.71 | 0.67 | 0.04  |
| <b>cg07438586</b> | chr6:30509366       | GNL1    | 3'UTR   | II | 1.29E-04 | 1 | 3.60E-04 | 0.15 | 0.19 | -0.04 |
| <b>cg06637938</b> | chr14:75390232      | RPS6KL1 | TSS1500 | I  | 1.31E-04 | 1 | 5.27E-05 | 0.18 | 0.22 | -0.04 |
| <b>cg26108046</b> | chr3:183535040      | MAP6D1  | 3'UTR   | II | 1.32E-04 | 1 | 2.04E-04 | 0.15 | 0.20 | -0.05 |
| <b>cg02765496</b> | chr9:71393662       | FAM122A | TSS1500 | II | 1.42E-04 | 1 | 4.08E-04 | 0.68 | 0.64 | 0.04  |



|                      |                 |            |         |    |          |   |          |      |      |       |
|----------------------|-----------------|------------|---------|----|----------|---|----------|------|------|-------|
| <b>cg23729107</b>    | chr17:6679264   | FBXO39     | TSS1500 | I  | 1.44E-04 | 1 | 3.62E-04 | 0.06 | 0.05 | 0.01  |
| <b>cg17009978</b>    | chr3:183959000  | VWA5B2     | Body    | II | 1.48E-04 | 1 | 4.25E-04 | 0.75 | 0.71 | 0.04  |
| <b>cg19248564</b>    | chr22:43042879  | CYB5R3     | 5'UTR   | II | 1.50E-04 | 1 | 2.52E-04 | 0.13 | 0.16 | -0.03 |
| <b>cg16046505</b>    | chr1:246582116  | SMYD3      | Body    | II | 1.51E-04 | 1 | 4.11E-04 | 0.20 | 0.23 | -0.04 |
| <b>cg20751795</b>    | chr19:58281019  | ZNF586     | TSS200  | I  | 1.64E-04 | 1 | 2.59E-04 | 0.06 | 0.06 | 0.01  |
| <b>cg11481687</b>    | chr14:105499998 | -          | -       | I  | 1.68E-04 | 1 | 4.46E-04 | 0.26 | 0.31 | -0.05 |
| <b>cg00102266</b>    | chr1:121429834  | -          | -       | II | 1.68E-04 | 1 | 2.23E-04 | 0.85 | 0.82 | 0.03  |
| <b>cg07062338</b>    | chr10:123301036 | FGFR2      | Body    | II | 1.79E-04 | 1 | 7.14E-05 | 0.78 | 0.74 | 0.04  |
| <b>cg00390784</b>    | chr6:2682491    | MYLK4      | Body    | II | 1.81E-04 | 1 | 2.39E-04 | 0.86 | 0.89 | -0.03 |
| <b>cg13600257</b>    | chr6:170449417  | -          | -       | II | 1.93E-04 | 1 | 1.83E-04 | 0.16 | 0.19 | -0.03 |
| <b>cg18003751</b>    | chr8:1350552    | -          | -       | II | 1.93E-04 | 1 | 5.09E-04 | 0.81 | 0.84 | -0.03 |
| <b>cg11571585</b>    | chr13:28365638  | GSX1       | TSS1500 | II | 1.95E-04 | 1 | 9.09E-05 | 0.08 | 0.10 | -0.02 |
| <b>cg10380652</b>    | chr1:65612850   | AK3L1      | TSS1500 | II | 1.96E-04 | 1 | 2.66E-04 | 0.13 | 0.17 | -0.04 |
| <b>cg15613100</b>    | chr5:72804620   | -          | -       | II | 1.96E-04 | 1 | 5.24E-04 | 0.78 | 0.73 | 0.05  |
| <b>cg26125384</b>    | chr2:70314274   | PCBP1      | TSS1500 | I  | 1.96E-04 | 1 | 4.49E-04 | 0.14 | 0.17 | -0.02 |
| <b>cg27650870</b>    | chr8:41583136   | ANK1       | Body    | II | 2.00E-04 | 1 | 3.44E-04 | 0.68 | 0.63 | 0.05  |
| <b>cg15827217</b>    | chr1:21833476   | -          | -       | II | 2.00E-04 | 1 | 3.58E-04 | 0.88 | 0.85 | 0.03  |
| <b>cg00688979</b>    | chr6:31113017   | CCHCR1     | Body    | II | 2.02E-04 | 1 | 5.73E-04 | 0.82 | 0.79 | 0.03  |
| <b>cg24744258</b>    | chr17:40939380  | WNK4       | Body    | II | 2.10E-04 | 1 | 2.13E-04 | 0.65 | 0.74 | -0.09 |
| <b>cg00363312</b>    | chr7:139333296  | HIPK2      | Body    | II | 2.16E-04 | 1 | 4.58E-04 | 0.84 | 0.79 | 0.05  |
| <b>ch.16.725323R</b> | chr16:23535908  | EARS2      | Body    | II | 2.20E-04 | 1 | 2.01E-04 | 0.16 | 0.20 | -0.04 |
| <b>cg12304482</b>    | chr15:28377846  | HERC2      | Body    | I  | 2.27E-04 | 1 | 2.67E-04 | 0.90 | 0.87 | 0.03  |
| <b>cg13917151</b>    | chr1:27730185   | -          | -       | II | 2.33E-04 | 1 | 5.55E-04 | 0.69 | 0.65 | 0.04  |
| <b>cg02997111</b>    | chr19:41698906  | CYP2S1     | TSS1500 | II | 2.38E-04 | 1 | 5.22E-05 | 0.08 | 0.10 | -0.02 |
| <b>cg17089179</b>    | chr2:42990647   | OXER1      | 1stExon | I  | 2.39E-04 | 1 | 8.39E-05 | 0.92 | 0.87 | 0.05  |
| <b>cg02288001</b>    | chr5:111496931  | NCRNA00219 | Body    | II | 2.39E-04 | 1 | 6.38E-04 | 0.12 | 0.14 | -0.02 |
| <b>cg26020521</b>    | chr11:8680436   | TRIM66     | TSS200  | II | 2.47E-04 | 1 | 5.37E-04 | 0.16 | 0.22 | -0.05 |
| <b>cg27033923</b>    | chr15:41106683  | ZFYVE19    | 3'UTR   | II | 2.55E-04 | 1 | 5.42E-04 | 0.89 | 0.87 | 0.03  |
| <b>cg01169396</b>    | chr5:179372900  | -          | -       | II | 2.61E-04 | 1 | 4.14E-04 | 0.78 | 0.83 | -0.05 |

|                   |                     |           |         |    |          |   |          |      |      |       |
|-------------------|---------------------|-----------|---------|----|----------|---|----------|------|------|-------|
| <b>cg07128326</b> | chr7:973490         | ADAP1     | Body    | II | 2.62E-04 | 1 | 1.44E-04 | 0.81 | 0.84 | -0.02 |
| <b>cg00310412</b> | chr15:74724918      | SEMA7A    | Body    | II | 2.68E-04 | 1 | 7.61E-04 | 0.16 | 0.20 | -0.05 |
| <b>cg23636406</b> | chr17:12622228      | MYOCD     | Body    | II | 2.80E-04 | 1 | 6.56E-04 | 0.72 | 0.68 | 0.03  |
| <b>cg26999345</b> | chr22:37584441      | C1QTNF6   | TSS200  | II | 2.81E-04 | 1 | 5.67E-04 | 0.64 | 0.58 | 0.07  |
| <b>cg01178486</b> | chr5:68664852       | TAF9      | Body    | II | 2.81E-04 | 1 | 1.17E-04 | 0.12 | 0.15 | -0.02 |
| <b>cg03290560</b> | chr3:117774686      | -         | -       | II | 3.05E-04 | 1 | 1.27E-04 | 0.85 | 0.88 | -0.03 |
| <b>cg05767562</b> | chr17:76227422      | LOC283999 | 5'UTR   | II | 3.06E-04 | 1 | 8.45E-04 | 0.64 | 0.59 | 0.05  |
| <b>cg21828899</b> | chr17:79980823      | LRRC45    | TSS1500 | I  | 3.10E-04 | 1 | 7.55E-04 | 0.07 | 0.08 | -0.01 |
| <b>cg01000937</b> | chr14:30730636      | -         | -       | I  | 3.10E-04 | 1 | 6.41E-04 | 0.84 | 0.87 | -0.03 |
| <b>cg01325465</b> | chr16:85123554      | KIAA0513  | 3'UTR   | II | 3.16E-04 | 1 | 7.66E-04 | 0.19 | 0.23 | -0.05 |
| <b>cg10930101</b> | chr17:62085466      | ICAM2     | TSS1500 | II | 3.18E-04 | 1 | 6.17E-04 | 0.87 | 0.85 | 0.02  |
| <b>cg11070176</b> | chr11:70489806      | SHANK2    | Body    | II | 3.18E-04 | 1 | 2.46E-04 | 0.68 | 0.61 | 0.07  |
| <b>cg17170741</b> | chr17:17942558      | ATPAF2    | TSS200  | I  | 3.19E-04 | 1 | 6.20E-04 | 0.09 | 0.10 | -0.01 |
| <b>cg14374521</b> | chr10:12463887<br>4 | FAM24B    | 5'UTR   | I  | 3.21E-04 | 1 | 2.26E-04 | 0.24 | 0.16 | 0.08  |
| <b>cg21041329</b> | chr8:56686126       | TMEM68    | TSS1500 | I  | 3.22E-04 | 1 | 5.45E-04 | 0.09 | 0.10 | -0.01 |
| <b>cg16818361</b> | chr3:118792317      | IGSF11    | Body    | II | 3.24E-04 | 1 | 3.89E-04 | 0.90 | 0.88 | 0.02  |
| <b>cg15589582</b> | chr3:5261136        | EDEM1     | 3'UTR   | II | 3.25E-04 | 1 | 5.54E-04 | 0.41 | 0.50 | -0.09 |

<sup>1</sup>Guintivano, J., Aryee, M. J. & Kaminsky, Z. A. *Epigenetics* 8, 290-302,(2013).

**SUPPLEMENTARY TABLE 6 - List of differentially methylated regions (FDR<0.05) in the prefrontal cortex.** Regions are annotated with genomic position (hg19, GRCh37), nearest gene and number of probes.

| Genomic Region            | Gene         | Probes | Beta Difference | Mean SZ | Mean control | p-value  | FDR      |
|---------------------------|--------------|--------|-----------------|---------|--------------|----------|----------|
| <i>Gene body</i>          |              |        |                 |         |              |          |          |
| chr12:101342113-101480470 | ANO4         | 8      | 0.02            | 0.65    | 0.63         | 3.92E-06 | 3.07E-02 |
| chr6:5999266-6006917      | NRN1         | 29     | -0.02           | 0.24    | 0.26         | 8.28E-06 | 3.07E-02 |
| chr8:38125449-38126556    | PPAPDC1B     | 5      | -0.01           | 0.16    | 0.17         | 2.65E-06 | 3.07E-02 |
| chr9:130830948-130868874  | NAIF1        | 9      | -0.03           | 0.39    | 0.42         | 5.10E-06 | 3.07E-02 |
| chr19:36266840-36269387   | SNX26        | 2      | -0.03           | 0.44    | 0.47         | 6.85E-06 | 3.07E-02 |
| chr14:77296234-77335130   | C14orf166B   | 6      | 0.02            | 0.68    | 0.66         | 1.23E-05 | 3.25E-02 |
| chr19:6414982-6424217     | KHSRP        | 7      | -0.02           | 0.58    | 0.61         | 1.06E-05 | 3.25E-02 |
| chr14:24550845-24551147   | NRL          | 3      | -0.02           | 0.23    | 0.25         | 1.40E-05 | 3.26E-02 |
| chr15:85361858-85383124   | ALPK3        | 6      | 0.01            | 0.74    | 0.73         | 1.88E-05 | 3.88E-02 |
| chr3:44397397-44397397    | C3orf23      | 1      | -0.07           | 0.58    | 0.66         | 2.71E-05 | 4.19E-02 |
| chr8:30556362-30583924    | GSR          | 4      | -0.02           | 0.71    | 0.73         | 2.49E-05 | 4.19E-02 |
| chr9:137967652-138011814  | OLFM1        | 24     | -0.02           | 0.51    | 0.53         | 2.31E-05 | 4.19E-02 |
| <i>Island</i>             |              |        |                 |         |              |          |          |
| chr10:101287381-101287846 |              | 5      | -0.02           | 0.16    | 0.18         | 3.61E-06 | 4.28E-02 |
| chr13:114806955-114807060 | RASA3        | 2      | -0.07           | 0.62    | 0.69         | 2.80E-06 | 4.28E-02 |
| chr14:24550395-24551147   | NRL          | 4      | -0.02           | 0.19    | 0.21         | 4.86E-06 | 4.28E-02 |
| <i>North Shelf</i>        |              |        |                 |         |              |          |          |
| chr19:47204096-47204096   | PRKD2        | 1      | -0.04           | 0.67    | 0.71         | 9.50E-07 | 9.35E-03 |
| chr22:29873338-29873338   |              | 1      | -0.06           | 0.56    | 0.62         | 1.13E-06 | 9.35E-03 |
| chr14:105235891-105236654 | AKT1         | 4      | -0.03           | 0.53    | 0.56         | 2.90E-06 | 9.86E-03 |
| chr17:65037838-65037838   |              | 1      | 0.04            | 0.78    | 0.74         | 2.97E-06 | 9.86E-03 |
| chr19:6421149-6421747     | KHSRP        | 2      | -0.03           | 0.57    | 0.61         | 2.56E-06 | 9.86E-03 |
| chr7:5518071-5518918      | FBXL18       | 4      | -0.04           | 0.54    | 0.58         | 1.48E-05 | 4.09E-02 |
| <i>North Shore</i>        |              |        |                 |         |              |          |          |
| chr6:6000601-6001842      | NRN1         | 3      | -0.04           | 0.66    | 0.7          | 9.90E-07 | 2.38E-02 |
| chr20:741049-741049       | C20orf54     | 1      | 0.03            | 0.84    | 0.81         | 4.30E-06 | 3.65E-02 |
| chr4:1201492-1202930      | LOC100130872 | 15     | -0.03           | 0.54    | 0.57         | 6.08E-06 | 3.65E-02 |
| chr8:38125449-38126029    | PPAPDC1B     | 3      | -0.02           | 0.21    | 0.24         | 4.59E-06 | 3.65E-02 |
| chr14:23289114-23290798   | SLC7A7       | 5      | 0.02            | 0.73    | 0.72         | 1.56E-05 | 4.16E-02 |
| chr15:42839559-42840397   | LRRC57       | 2      | -0.02           | 0.45    | 0.46         | 1.29E-05 | 4.16E-02 |
| chr2:237079122-237079967  |              | 5      | -0.03           | 0.28    | 0.31         | 1.53E-05 | 4.16E-02 |
| chr8:30583924-30583924    | GSR          | 1      | -0.06           | 0.62    | 0.68         | 1.18E-05 | 4.16E-02 |
| chr9:130964374-130964374  | CIZ1         | 1      | -0.04           | 0.61    | 0.65         | 1.45E-05 | 4.16E-02 |

| <i>South Shelf</i>               |          |   |       |      |      |          |          |
|----------------------------------|----------|---|-------|------|------|----------|----------|
| <b>chr14:77503345-77503345</b>   |          | 1 | -0.04 | 0.64 | 0.68 | 3.12E-06 | 4.86E-02 |
| <i>TSS1500</i>                   |          |   |       |      |      |          |          |
| <b>chr17:46692534-46693336</b>   | HOXB8    | 4 | -0.02 | 0.24 | 0.27 | 2.20E-06 | 4.41E-02 |
| <i>TSS200</i>                    |          |   |       |      |      |          |          |
| <b>chr4:2627014-2627142</b>      | FAM193A  | 4 | -0.04 | 0.5  | 0.53 | 1.17E-07 | 2.02E-03 |
| <i>UTR'3</i>                     |          |   |       |      |      |          |          |
| <b>chr14:105235891-105236654</b> | AKT1     | 4 | -0.03 | 0.53 | 0.56 | 2.91E-06 | 1.17E-02 |
| <b>chr1:57383752-57383752</b>    | C8A      | 1 | 0.03  | 0.82 | 0.79 | 2.18E-06 | 1.17E-02 |
| <b>chr1:109852598-109852598</b>  | SORT1    | 1 | -0.04 | 0.59 | 0.64 | 1.37E-06 | 1.17E-02 |
| <b>chr20:741049-741049</b>       | C20orf54 | 1 | 0.03  | 0.84 | 0.81 | 5.62E-06 | 1.69E-02 |
| <b>chr14:55819305-55819305</b>   | FBXO34   | 1 | -0.04 | 0.77 | 0.81 | 7.46E-06 | 1.79E-02 |
| <b>chr17:695428-695661</b>       | RNMTL1   | 2 | -0.04 | 0.64 | 0.69 | 9.13E-06 | 1.83E-02 |
| <b>chr19:55670288-55670288</b>   | C19orf51 | 1 | -0.04 | 0.72 | 0.76 | 3.66E-05 | 4.65E-02 |
| <b>chr11:85630744-85630744</b>   | CCDC83   | 1 | 0.05  | 0.69 | 0.64 | 4.25E-05 | 4.65E-02 |
| <b>chr20:36151184-36151683</b>   | BLCAP    | 3 | -0.02 | 0.61 | 0.63 | 4.22E-05 | 4.65E-02 |
| <b>chr14:23794739-23794739</b>   | PABPN1   | 1 | -0.04 | 0.73 | 0.77 | 3.09E-05 | 4.65E-02 |
| <b>chr2:38970936-38970936</b>    | SFRS7    | 1 | -0.06 | 0.7  | 0.76 | 3.17E-05 | 4.65E-02 |

**SUPPLEMENTARY TABLE 7 – Bisulfite-pyrosequencing primers used in validation assays.**

| 450K probe |                         | Gene         | PCR Primers (5'-3')                                                                                 | Sequence analyzed (5'-3')                      |
|------------|-------------------------|--------------|-----------------------------------------------------------------------------------------------------|------------------------------------------------|
| Probe ID   | Genomic position (hg19) |              |                                                                                                     |                                                |
| cg00565348 | chr6:6003303            | <i>NRN1</i>  | F: ATTGTTGGTGGTTTTAGGGATTATAT<br>R: Biot-ACACTTCCCAACAAACCCTATCA<br>S: GTTTATTATTTAGTAGTGTGG        | TTGAGYGGTTTATTAAGGATAGAGYGTTAAGTTTGAGGTTTATTTT |
| cg23844013 | chr1:57383752           | <i>C8A</i>   | F: AGGGAGAATTTATAGGATGTTAGAG<br>R: Biot-CAAAATATCTACTTACCCTACCAATTA<br>S: GAGATAAAATAAGTAGATATTTGAA | ATAATTAAYGTTTAATAAAATAAAGTAGGATGAAAATTTTTT     |
| cg24803255 | chr13:114807060         | <i>RASA3</i> | F: TTGTTTTGGTGGTGTGTGAG<br>R: Biot-ACTAACTACACCAAACTCTAATCT<br>S: TGGTGGTGTGTGAGG                   | TAYGGGGTGTTTATTTGTGAGATTAGAGT                  |

**SUPPLEMENTARY TABLE 8 – Technical validation of disease associated DNA methylation at CpG sites in the *C8A*, *NRN1* and *RASA3* genes.** \*T-test values from the pyrosequencing analysis are from a one-sided test. Pyro=pyrosequencing.

|                                                           | <b>C8A</b><br>(cg23844013) |             | <b>NRN1 CpG1</b><br>(cg00565348) |             | <b>NRN1 CpG2</b> |             | <b>RASA3</b><br>(cg24803255) |             |
|-----------------------------------------------------------|----------------------------|-------------|----------------------------------|-------------|------------------|-------------|------------------------------|-------------|
|                                                           | <b>450K</b>                | <b>Pyro</b> | <b>450K</b>                      | <b>Pyro</b> | <b>450K</b>      | <b>Pyro</b> | <b>450K</b>                  | <b>Pyro</b> |
| <b>SZ DNA methylation (%) (mean±sd)</b>                   | 82.1±1.6                   | 82.2±1.8    | 35.1 ±2.2                        | 31.6±4.1    | -                | 32.8±4.0    | 56.4±4.1                     | 66.4±3.2    |
| <b>Control DNA methylation (%) (mean±sd)</b>              | 79.4±1.6                   | 81.2±1.7    | 38.7±2.6                         | 33.3±4.6    | -                | 35.0±4.1    | 65.1±4.7                     | 70.5±3.7    |
| <b>Mean difference DNA methylation (%) (SZ - Control)</b> | 2.7                        | 0.9         | -3.5                             | -1.9        | -                | -2.7        | -8.7                         | -4.0        |
| <b>T-test t-statistic</b>                                 | 5.61                       | 1.84        | -4.85                            | -1.19       | -                | -1.74       | -6.44                        | -3.83       |
| <b>T-test P-value*</b>                                    | 1.67e-06                   | 0.04        | 1.81e-05                         | 0.12        | -                | 0.04        | 1.03e-07                     | 2.16e-04    |

**SUPPLEMENTARY TABLE 9 – Details of post-mortem brain samples from Douglas Mental Health University Institute Research Centre.** Schizophrenia cases and controls do not significantly differ for any of the available quality metrics (t-test p-value>0.05). SZ=schizophrenia.

|                               | <b>SZ</b>   | <b>Control</b> | <b>Total</b> | <b>p-value</b> |
|-------------------------------|-------------|----------------|--------------|----------------|
| <b>Number</b>                 | 18          | 15             | 33           |                |
| <b>Sex (male:female)</b>      | 15:3        | 13:2           | 28:5         |                |
| <b>Age at death (years)</b>   | 45.5 ± 16.6 | 42.3 ± 14.8    | 44.0 ± 15.7  | 0.28           |
| <b>Total brain weight (g)</b> | 1432 ± 188  | 1463 ± 175     | 1447 ± 179   | 0.32           |
| <b>pH</b>                     | 6.6 ± 0.28  | 6.48 ± 0.33    | 6.54 ± 0.31  | 0.13           |

**SUPPLEMENTARY TABLE 10 – Details of individual post-mortem brain samples samples from Douglas Mental Health University Institute Research Centre. NA=not available.**

| <b>ID</b>                   | <b>Sex</b> | <b>Age at death (years)</b> | <b>Total brain weight (g)</b> | <b>pH</b> |
|-----------------------------|------------|-----------------------------|-------------------------------|-----------|
| <b><i>Schizophrenia</i></b> |            |                             |                               |           |
| <b>MS01</b>                 | M          | 70                          | 1280                          | 6.01      |
| <b>MS02</b>                 | F          | 73                          | NA                            | 6.16      |
| <b>MS03</b>                 | M          | 30                          | 1321                          | 6.42      |
| <b>MS04</b>                 | F          | 60                          | 1175                          | 6.23      |
| <b>MS05</b>                 | F          | 51                          | 1125                          | 6.35      |
| <b>MS06</b>                 | M          | 50                          | 1615                          | 6.55      |
| <b>MS07</b>                 | M          | 29                          | 1520                          | 6.27      |
| <b>MS08</b>                 | M          | 24                          | NA                            | 6.01      |
| <b>MS09</b>                 | M          | 69                          | 1295                          | 6.23      |
| <b>MS10</b>                 | M          | 38                          | 1550                          | 6.32      |
| <b>MS11</b>                 | M          | 39                          | 1680                          | 6.16      |
| <b>MS12</b>                 | M          | 47                          | 1516                          | 5.76      |
| <b>MS13</b>                 | M          | 65                          | 1320                          | 6.27      |
| <b>MS14</b>                 | M          | 26                          | 1430                          | 6.44      |
| <b>MS15</b>                 | M          | 29                          | NA                            | 6.52      |
| <b>MS16</b>                 | M          | 33                          | 1812                          | 5.92      |
| <b>MS17</b>                 | M          | 32                          | 1408                          | 6.05      |
| <b>MS18</b>                 | M          | 54                          | 1430                          | 6.47      |
| <b><i>Control</i></b>       |            |                             |                               |           |
| <b>MS19</b>                 | F          | 57                          | 1250                          | 5.73      |
| <b>MS20</b>                 | M          | 57                          | 1400                          | 5.72      |
| <b>MS21</b>                 | F          | 50                          | 1205                          | 6.10      |
| <b>MS22</b>                 | M          | 43                          | 1343                          | 6.25      |
| <b>MS23</b>                 | M          | 44                          | 1375                          | 5.41      |
| <b>MS24</b>                 | M          | 28                          | 1565                          | 6.59      |
| <b>MS25</b>                 | M          | 26                          | 1749                          | 6.43      |
| <b>MS26</b>                 | M          | 30                          | 1517                          | 6.22      |
| <b>MS27</b>                 | M          | 37                          | 1491                          | 6.21      |
| <b>MS28</b>                 | M          | 41                          | 1430                          | 5.89      |
| <b>MS29</b>                 | M          | 33                          | 1670                          | 6.34      |
| <b>MS30</b>                 | M          | 66                          | 1260                          | 6.09      |
| <b>MS31</b>                 | M          | 21                          | 1783                          | 6.27      |
| <b>MS32</b>                 | M          | 32                          | 1516                          | 6.49      |
| <b>MS33</b>                 | M          | 69                          | 1390                          | 6.04      |



**SUPPLEMENTARY TABLE 11 – DNA methylation data from the Montreal dataset matching the 100 top-ranked schizophrenia-associated DMPs from the LBBND prefrontal cortex dataset.** DNA methylation differences at these loci are significantly correlated across datasets ( $r=0.54$ ,  $p=6.8e-09$ , see **Figure 1c**).

| Probe ID   | Genomic position (hg19) | Gene    | Gene region | London Mean SZ | London Mean Control | London Beta difference | Montreal Mean SZ | Montreal Mean Control | Montreal Beta difference |
|------------|-------------------------|---------|-------------|----------------|---------------------|------------------------|------------------|-----------------------|--------------------------|
| cg26173173 | chr8:144642813          | GSDMD   | Body        | 0.83           | 0.79                | 0.04                   | 0.79             | 0.77                  | 0.02                     |
| cg24803255 | chr13:114807060         | RASA3   | Body        | 0.56           | 0.65                | -0.09                  | 0.61             | 0.65                  | -0.04                    |
| cg00903099 | chr7:154862441          | HTR5A   | TSS200      | 0.09           | 0.12                | -0.02                  | 0.09             | 0.09                  | 0.00                     |
| cg08171022 | chr11:70185278          | PPFIA1  | Body        | 0.48           | 0.53                | -0.05                  | 0.47             | 0.48                  | -0.01                    |
| cg02857643 | chr17:48696108          | CACNA1G | Body        | 0.87           | 0.92                | -0.05                  | 0.94             | 0.92                  | 0.01                     |
| cg00236305 | chr2:1796076            | MYT1L   | Body        | 0.67           | 0.73                | -0.06                  | 0.69             | 0.71                  | -0.02                    |
| cg14966346 | chr14:104152124         | KLC1    | Body        | 0.72           | 0.77                | -0.05                  | 0.73             | 0.74                  | -0.01                    |
| cg13079528 | chr7:4027346            | SDK1    | Body        | 0.71           | 0.79                | -0.08                  | 0.81             | 0.83                  | -0.02                    |
| cg14429765 | chr8:6492531            | MCPH1   | Body        | 0.79           | 0.76                | 0.03                   | 0.74             | 0.73                  | 0.01                     |
| cg08602214 | chr8:22864392           | RHOBTB2 | Body        | 0.69           | 0.75                | -0.07                  | 0.77             | 0.78                  | -0.01                    |
| cg19735533 | chr2:241196887          |         |             | 0.76           | 0.81                | -0.06                  | 0.77             | 0.76                  | 0.02                     |
| cg09507608 | chr22:29873338          |         |             | 0.56           | 0.62                | -0.06                  | 0.56             | 0.58                  | -0.02                    |
| cg23844013 | chr1:57383752           | C8A     | 3'UTR       | 0.82           | 0.79                | 0.03                   | 0.78             | 0.79                  | -0.01                    |
| cg26578910 | chr19:47204096          | PRKD2   | Body        | 0.67           | 0.71                | -0.04                  | 0.73             | 0.75                  | -0.02                    |
| cg21847368 | chr13:113744010         | MCF2L   | Body        | 0.80           | 0.84                | -0.03                  | 0.81             | 0.81                  | 0.00                     |
| cg03607729 | chr16:25138698          | LCMT1   | Body        | 0.70           | 0.75                | -0.04                  | 0.69             | 0.69                  | 0.00                     |
| cg10248981 | chr10:126157948         | LHPP    | Body        | 0.55           | 0.63                | -0.07                  | 0.61             | 0.64                  | -0.03                    |
| cg03445663 | chr2:242170236          | HDLBP   | Body        | 0.51           | 0.59                | -0.08                  | 0.60             | 0.63                  | -0.03                    |
| cg15079231 | chr3:42572745           | VIPR1   | Body        | 0.76           | 0.80                | -0.04                  | 0.74             | 0.76                  | -0.02                    |
| cg21341878 | chr4:2278462            | ZFYVE28 | Body        | 0.75           | 0.81                | -0.05                  | 0.80             | 0.81                  | -0.01                    |
| cg04922803 | chr12:104444418         | GLT8D2  | TSS1500     | 0.68           | 0.62                | 0.06                   | 0.59             | 0.59                  | 0.00                     |
| cg18857062 | chr6:43276478           | CRIP3   | Body        | 0.21           | 0.26                | -0.04                  | 0.23             | 0.25                  | -0.02                    |
| cg27138871 | chr11:74950396          |         |             | 0.75           | 0.79                | -0.05                  | 0.78             | 0.79                  | -0.02                    |
| cg27363226 | chr19:6421747           | KHSRP   | Body        | 0.62           | 0.67                | -0.05                  | 0.65             | 0.66                  | -0.01                    |
| cg02187259 | chr2:16804452           | FAM49A  | 5'UTR       | 0.74           | 0.79                | -0.05                  | 0.75             | 0.77                  | -0.02                    |
| cg26182253 | chr13:112236782         |         |             | 0.60           | 0.67                | -0.06                  | 0.65             | 0.68                  | -0.02                    |

|                   |                 |                    |         |      |      |       |      |      |       |
|-------------------|-----------------|--------------------|---------|------|------|-------|------|------|-------|
| <b>cg14370653</b> | chr9:137828210  |                    |         | 0.75 | 0.80 | -0.05 | 0.77 | 0.77 | 0.01  |
| <b>cg14527262</b> | chr4:1202653    | LOC100130872-SPON2 | TSS200  | 0.56 | 0.63 | -0.07 | 0.68 | 0.72 | -0.04 |
| <b>cg16393877</b> | chr17:65037838  |                    |         | 0.78 | 0.74 | 0.04  | 0.72 | 0.72 | 0.01  |
| <b>cg26130533</b> | chr4:1202700    | LOC100130872-SPON2 | TSS200  | 0.57 | 0.63 | -0.06 | 0.58 | 0.58 | 0.00  |
| <b>cg05860371</b> | chr4:152931291  |                    |         | 0.63 | 0.69 | -0.06 | 0.65 | 0.67 | -0.02 |
| <b>cg03363012</b> | chr20:741049    | C2orf54            | 3'UTR   | 0.84 | 0.81 | 0.03  | 0.79 | 0.77 | 0.02  |
| <b>cg21609813</b> | chr8:22004881   | LGI3               | 3'UTR   | 0.77 | 0.73 | 0.04  | 0.75 | 0.73 | 0.02  |
| <b>cg27608031</b> | chr16:77353824  | ADAMTS18           | Body    | 0.73 | 0.68 | 0.04  | 0.64 | 0.62 | 0.02  |
| <b>cg21390682</b> | chr13:113743751 | MCF2L              | Body    | 0.68 | 0.73 | -0.05 | 0.65 | 0.65 | 0.00  |
| <b>cg27654476</b> | chr14:77503345  |                    |         | 0.64 | 0.68 | -0.04 | 0.61 | 0.62 | -0.01 |
| <b>cg20930320</b> | chr1:109852598  | SORT1              | 3'UTR   | 0.59 | 0.64 | -0.04 | 0.57 | 0.58 | -0.01 |
| <b>cg12864185</b> | chr1:240160972  |                    |         | 0.17 | 0.22 | -0.05 | 0.15 | 0.16 | -0.01 |
| <b>cg13119928</b> | chr12:53228661  | KRT79              | TSS1500 | 0.81 | 0.78 | 0.03  | 0.76 | 0.76 | 0.00  |
| <b>cg20681783</b> | chr5:8839868    |                    |         | 0.38 | 0.33 | 0.05  | 0.32 | 0.33 | -0.01 |
| <b>cg07114544</b> | chr17:9110369   | NTN1               | Body    | 0.73 | 0.69 | 0.04  | 0.70 | 0.69 | 0.01  |
| <b>cg09419102</b> | chr11:65550444  |                    |         | 0.70 | 0.66 | 0.04  | 0.66 | 0.65 | 0.01  |
| <b>cg25778661</b> | chr19:56031373  |                    |         | 0.79 | 0.84 | -0.05 | 0.79 | 0.80 | -0.01 |
| <b>cg13280041</b> | chr6:138866865  | NHSL1              | Body    | 0.31 | 0.26 | 0.05  | 0.27 | 0.25 | 0.03  |
| <b>cg14772639</b> | chr2:128711564  | SAP130             | Body    | 0.79 | 0.74 | 0.04  | 0.74 | 0.72 | 0.02  |
| <b>cg09942424</b> | chr17:74913419  | MGAT5B             | Body    | 0.78 | 0.82 | -0.04 | 0.79 | 0.79 | 0.00  |
| <b>cg04691233</b> | chr11:133989435 | JAM3               | Body    | 0.84 | 0.80 | 0.04  | 0.77 | 0.77 | 0.01  |
| <b>cg07500432</b> | chr18:77918588  | PAR6G              | Body    | 0.81 | 0.71 | 0.11  | 0.82 | 0.80 | 0.02  |
| <b>cg03991188</b> | chr7:98870835   | MYH16              | TSS200  | 0.82 | 0.78 | 0.04  | 0.79 | 0.78 | 0.02  |
| <b>cg21843517</b> | chr12:123950174 | SNRNP35            | Body    | 0.83 | 0.79 | 0.04  | 0.79 | 0.76 | 0.02  |
| <b>cg12198176</b> | chr22:23415316  | RTDR1              | Body    | 0.63 | 0.68 | -0.05 | 0.67 | 0.67 | 0.00  |
| <b>cg19643441</b> | chr19:19417142  | SF4                | Body    | 0.80 | 0.83 | -0.03 | 0.81 | 0.82 | -0.01 |
| <b>cg07289133</b> | chr16:85147146  | FAM92B             | TSS1500 | 0.74 | 0.69 | 0.05  | 0.66 | 0.66 | 0.00  |
| <b>cg11945824</b> | chr6:32116963   | PRRT1              | 3'UTR   | 0.58 | 0.64 | -0.06 | 0.69 | 0.70 | 0.00  |
| <b>cg20011075</b> | chr1:4008090    |                    |         | 0.62 | 0.69 | -0.07 | 0.76 | 0.76 | 0.00  |
| <b>cg14752965</b> | chr17:17579346  |                    |         | 0.75 | 0.80 | -0.05 | 0.79 | 0.77 | 0.01  |
| <b>cg07421682</b> | chr15:102030850 | PCSK6              | TSS1500 | 0.76 | 0.82 | -0.05 | 0.80 | 0.80 | 0.00  |

|                   |                 |           |         |      |      |       |      |      |       |
|-------------------|-----------------|-----------|---------|------|------|-------|------|------|-------|
| <b>cg22697364</b> | chr5:32709859   |           |         | 0.26 | 0.22 | 0.04  | 0.16 | 0.17 | -0.01 |
| <b>cg25790133</b> | chr4:2627014    | FAM193A   | TSS200  | 0.51 | 0.57 | -0.06 | 0.53 | 0.56 | -0.03 |
| <b>cg10622536</b> | chr1:36771021   | C1orf113  | TSS1500 | 0.77 | 0.81 | -0.04 | 0.77 | 0.80 | -0.03 |
| <b>cg01936649</b> | chr6:164062746  |           |         | 0.76 | 0.82 | -0.06 | 0.81 | 0.81 | 0.00  |
| <b>cg07665929</b> | chr5:171523225  | STK10     | Body    | 0.59 | 0.66 | -0.07 | 0.63 | 0.64 | -0.02 |
| <b>cg21375204</b> | chr7:73752935   | CLIP2     | Body    | 0.75 | 0.80 | -0.05 | 0.86 | 0.88 | -0.02 |
| <b>cg23203234</b> | chr8:103751623  |           |         | 0.71 | 0.76 | -0.05 | 0.73 | 0.74 | -0.01 |
| <b>cg04215055</b> | chr17:74911520  | MGAT5B    | Body    | 0.65 | 0.71 | -0.06 | 0.74 | 0.74 | 0.00  |
| <b>cg06168875</b> | chr19:13988438  | NANOS3    | 1stExon | 0.76 | 0.82 | -0.06 | 0.82 | 0.81 | 0.01  |
| <b>cg24079702</b> | chr2:106015771  | FHL2      | TSS200  | 0.17 | 0.21 | -0.04 | 0.12 | 0.10 | 0.01  |
| <b>cg25900150</b> | chr8:144601851  | ZC3H3     | Body    | 0.81 | 0.89 | -0.07 | 0.90 | 0.91 | -0.01 |
| <b>cg27097992</b> | chr14:104800950 |           |         | 0.66 | 0.54 | 0.12  | 0.61 | 0.61 | 0.00  |
| <b>cg22060153</b> | chr2:101889653  | SNORD89   | TSS200  | 0.68 | 0.72 | -0.04 | 0.65 | 0.66 | -0.01 |
| <b>cg23996071</b> | chr1:60280809   | HOOK1     | 1stExon | 0.18 | 0.22 | -0.04 | 0.15 | 0.16 | -0.01 |
| <b>cg07815131</b> | chr6:99289733   |           |         | 0.39 | 0.44 | -0.06 | 0.44 | 0.44 | 0.00  |
| <b>cg05583087</b> | chr3:12894947   |           |         | 0.46 | 0.51 | -0.06 | 0.47 | 0.49 | -0.02 |
| <b>cg03724006</b> | chr11:62790783  |           |         | 0.48 | 0.54 | -0.06 | 0.50 | 0.52 | -0.03 |
| <b>cg10535500</b> | chr6:33398610   | SYNGAP1   | Body    | 0.43 | 0.47 | -0.04 | 0.38 | 0.41 | -0.02 |
| <b>cg09235936</b> | chr2:242170211  | HDLBP     | Body    | 0.68 | 0.74 | -0.06 | 0.77 | 0.80 | -0.03 |
| <b>cg12473775</b> | chr11:66824650  | RHOD      | Body    | 0.72 | 0.68 | 0.04  | 0.66 | 0.66 | -0.01 |
| <b>cg27252696</b> | chr6:100912940  | SIM1      | TSS1500 | 0.07 | 0.09 | -0.01 | 0.05 | 0.05 | 0.00  |
| <b>cg00172872</b> | chr12:89461426  |           |         | 0.77 | 0.82 | -0.04 | 0.77 | 0.78 | -0.02 |
| <b>cg07780199</b> | chr19:18830892  | CRTC1     | Body    | 0.73 | 0.77 | -0.05 | 0.70 | 0.71 | 0.00  |
| <b>cg19671331</b> | chr8:143509438  |           |         | 0.72 | 0.80 | -0.08 | 0.82 | 0.81 | 0.00  |
| <b>cg26925590</b> | chr16:139752    | C16orf35  | Body    | 0.85 | 0.90 | -0.05 | 0.91 | 0.91 | 0.00  |
| <b>cg02064366</b> | chr17:79045526  | BAIAP2    | Body    | 0.62 | 0.67 | -0.05 | 0.71 | 0.75 | -0.04 |
| <b>cg17244485</b> | chr2:103443515  |           |         | 0.38 | 0.32 | 0.05  | 0.27 | 0.26 | 0.01  |
| <b>cg23236908</b> | chr14:55819305  | FBXO34    | 3'UTR   | 0.77 | 0.81 | -0.04 | 0.77 | 0.78 | -0.01 |
| <b>cg03962217</b> | chr7:154796431  | LOC202781 | Body    | 0.65 | 0.69 | -0.05 | 0.60 | 0.62 | -0.02 |
| <b>cg17356733</b> | chr21:34774627  | IFNGR2    | TSS1500 | 0.64 | 0.70 | -0.06 | 0.70 | 0.70 | 0.00  |
| <b>cg16040341</b> | chr15:83544284  | HOMER2    | Body    | 0.69 | 0.75 | -0.05 | 0.72 | 0.73 | -0.01 |

|                   |                 |          |       |      |      |       |      |      |       |
|-------------------|-----------------|----------|-------|------|------|-------|------|------|-------|
| <b>cg24038762</b> | chr1:87817476   |          |       | 0.73 | 0.77 | -0.04 | 0.72 | 0.73 | -0.01 |
| <b>cg05529091</b> | chr12:111475875 | CUX2     | Body  | 0.65 | 0.70 | -0.05 | 0.64 | 0.68 | -0.04 |
| <b>cg05374733</b> | chr12:42853791  | PRICKLE1 | Body  | 0.80 | 0.83 | -0.03 | 0.83 | 0.83 | 0.00  |
| <b>cg06746318</b> | chr7:101755186  | CUX1     | Body  | 0.70 | 0.76 | -0.06 | 0.78 | 0.79 | -0.01 |
| <b>cg08404546</b> | chr22:37910993  | CARD10   | Body  | 0.76 | 0.82 | -0.05 | 0.78 | 0.80 | -0.02 |
| <b>cg14905600</b> | chr10:134226361 | PWWP2B   | 3'UTR | 0.75 | 0.81 | -0.06 | 0.84 | 0.84 | -0.01 |
| <b>cg10976478</b> | chr2:241263838  |          |       | 0.84 | 0.80 | 0.04  | 0.79 | 0.79 | 0.00  |
| <b>cg21399807</b> | chr2:54955581   | EML6     | Body  | 0.74 | 0.78 | -0.04 | 0.69 | 0.70 | -0.01 |
| <b>cg21776682</b> | chr8:1387801    |          |       | 0.68 | 0.73 | -0.05 | 0.68 | 0.69 | -0.02 |
| <b>cg26593722</b> | chr16:87376314  | FBXO31   | Body  | 0.80 | 0.85 | -0.05 | 0.90 | 0.91 | -0.01 |
| <b>cg04543233</b> | chr20:21689105  | PAX1     | Body  | 0.16 | 0.19 | -0.04 | 0.14 | 0.15 | -0.01 |
| <b>cg06614697</b> | chr1:3696285    |          |       | 0.62 | 0.67 | -0.05 | 0.64 | 0.66 | -0.02 |

**SUPPLEMENTARY TABLE 12 - Top 20 enriched GO terms for genes in the WGCNA modules most highly associated with schizophrenia ('black' and 'pink').** GO enrichment for biological processes was performed using EASE (DAVID). Table shows GO term, number of genes (count), and p-values for EASE score and Benjamini-Hochberg adjustment.

| Gene Ontology Term                                    | GO:ID      | Count | p-value  | FDR Value |
|-------------------------------------------------------|------------|-------|----------|-----------|
| <b><i>Black module</i></b>                            |            |       |          |           |
| neuron projection                                     | GO:0043005 | 224   | 2.09E-14 | 1.32E-10  |
| neuron part                                           | GO:0097458 | 247   | 1.24E-11 | 3.92E-08  |
| dendrite                                              | GO:0030425 | 124   | 1.97E-11 | 4.02E-08  |
| synapse                                               | GO:0045202 | 170   | 2.99E-11 | 4.02E-08  |
| nervous system development                            | GO:0007399 | 453   | 3.19E-11 | 4.02E-08  |
| cytoskeletal protein binding                          | GO:0008092 | 207   | 2.89E-10 | 3.03E-07  |
| cell projection                                       | GO:0042995 | 344   | 7.85E-10 | 7.06E-07  |
| synapse part                                          | GO:0044456 | 126   | 5.42E-09 | 4.27E-06  |
| generation of neurons                                 | GO:0048699 | 303   | 6.26E-09 | 4.39E-06  |
| transmission of nerve impulse                         | GO:0019226 | 184   | 8.17E-09 | 5.15E-06  |
| multicellular organismal signaling                    | GO:0035637 | 188   | 1.37E-08 | 7.87E-06  |
| neuron projection morphogenesis                       | GO:0048812 | 153   | 1.50E-08 | 7.89E-06  |
| neuron projection development                         | GO:0031175 | 175   | 1.93E-08 | 9.37E-06  |
| neurogenesis                                          | GO:0022008 | 313   | 3.07E-08 | 1.38E-05  |
| synaptic transmission                                 | GO:0007268 | 176   | 3.50E-08 | 1.47E-05  |
| neuron development                                    | GO:0048666 | 200   | 5.10E-08 | 2.01E-05  |
| cell junction                                         | GO:0030054 | 213   | 6.27E-08 | 2.32E-05  |
| cell morphogenesis involved in neuron differentiation | GO:0048667 | 145   | 1.51E-07 | 5.28E-05  |
| synaptic membrane                                     | GO:0097060 | 81    | 2.60E-07 | 8.63E-05  |
| axon development                                      | GO:0061564 | 139   | 4.88E-07 | 1.54E-04  |
| <b><i>Pink module</i></b>                             |            |       |          |           |
| cell junction                                         | GO:0030054 | 161   | 2.58E-10 | 1.54E-06  |
| nervous system development                            | GO:0007399 | 302   | 4.11E-09 | 1.23E-05  |
| homophilic cell adhesion                              | GO:0007156 | 47    | 7.42E-09 | 1.48E-05  |
| synapse                                               | GO:0045202 | 110   | 5.87E-08 | 8.56E-05  |
| neuron projection development                         | GO:0031175 | 122   | 7.18E-08 | 8.56E-05  |
| neurogenesis                                          | GO:0022008 | 213   | 1.95E-07 | 1.83E-04  |
| calcium ion binding                                   | GO:0005509 | 129   | 2.14E-07 | 1.83E-04  |
| generation of neurons                                 | GO:0048699 | 202   | 3.04E-07 | 1.95E-04  |
| neuron projection morphogenesis                       | GO:0048812 | 104   | 3.19E-07 | 1.95E-04  |

|                                                       |            |     |          |          |
|-------------------------------------------------------|------------|-----|----------|----------|
| neuron projection                                     | GO:0043005 | 132 | 3.26E-07 | 1.95E-04 |
| neuron development                                    | GO:0048666 | 137 | 3.72E-07 | 2.01E-04 |
| neuron differentiation                                | GO:0030182 | 160 | 5.70E-07 | 2.83E-04 |
| cell development                                      | GO:0048468 | 220 | 8.21E-07 | 3.77E-04 |
| dendrite                                              | GO:0030425 | 75  | 1.07E-06 | 4.55E-04 |
| system development                                    | GO:0048731 | 488 | 1.89E-06 | 7.50E-04 |
| synaptic membrane                                     | GO:0097060 | 56  | 2.58E-06 | 8.62E-04 |
| cell morphogenesis involved in neuron differentiation | GO:0048667 | 98  | 2.60E-06 | 8.62E-04 |
| synapse part                                          | GO:0044456 | 81  | 2.60E-06 | 8.62E-04 |
| transmission of nerve impulse                         | GO:0019226 | 119 | 2.86E-06 | 8.97E-04 |

---

**SUPPLEMENTARY TABLE 13 - Correlation between DNA methylation and brain development (days post conception) in a cohort of 179 human fetal brain samples**, for the top 100 ranked DMPs between SZ and controls in prefrontal cortex. DMP=differentially methylated probe.

| SZ DMP rank | Probe ID   | Gene name | Pearson's R | p-value  | FDR      |
|-------------|------------|-----------|-------------|----------|----------|
| 74          | cg03724006 |           | -0.62       | 1.31E-20 | 1.28E-18 |
| 62          | cg07665929 | STK10     | -0.58       | 2.44E-17 | 1.20E-15 |
| 6           | cg00236305 | MYT1L     | -0.54       | 4.24E-15 | 1.39E-13 |
| 59          | cg25790133 | FAM193A   | -0.53       | 1.40E-14 | 3.43E-13 |
| 69          | cg27097992 |           | 0.53        | 2.49E-14 | 4.88E-13 |
| 86          | cg03962217 | LOC202781 | -0.51       | 3.39E-13 | 5.54E-12 |
| 41          | cg07114544 | NTN1      | 0.45        | 2.18E-10 | 3.05E-09 |
| 87          | cg17356733 | IFNGR2    | -0.44       | 9.63E-10 | 1.18E-08 |
| 53          | cg07289133 | FAM92B    | 0.43        | 2.33E-09 | 2.51E-08 |
| 77          | cg12473775 | RHOD      | 0.43        | 2.56E-09 | 2.51E-08 |
| 89          | cg24038762 |           | 0.41        | 1.70E-08 | 1.36E-07 |
| 93          | cg08404546 | CARD10    | -0.41       | 1.80E-08 | 1.36E-07 |
| 100         | cg06614697 |           | -0.41       | 1.67E-08 | 1.36E-07 |
| 4           | cg08171022 | PPFIA1    | -0.4        | 2.33E-08 | 1.63E-07 |
| 92          | cg06746318 | CUX1      | 0.4         | 2.68E-08 | 1.75E-07 |
| 8           | cg13079528 | SDK1      | 0.36        | 6.13E-07 | 3.75E-06 |
| 95          | cg10976478 |           | 0.36        | 6.70E-07 | 3.86E-06 |
| 31          | cg05860371 |           | -0.35       | 1.40E-06 | 7.53E-06 |
| 75          | cg10535500 | SYNGAP1   | -0.35       | 1.46E-06 | 7.53E-06 |
| 21          | cg04922803 | GLT8D2    | -0.35       | 1.71E-06 | 8.38E-06 |
| 67          | cg24079702 | FHL2      | 0.34        | 3.93E-06 | 1.83E-05 |
| 83          | cg02064366 | BAIAP2    | -0.32       | 9.07E-06 | 4.04E-05 |
| 12          | cg09507608 |           | -0.3        | 4.49E-05 | 1.91E-04 |
| 90          | cg05529091 | CUX2      | -0.29       | 7.18E-05 | 2.93E-04 |
| 22          | cg18857062 | CRIP3     | -0.28       | 1.65E-04 | 6.47E-04 |
| 49          | cg03991188 | MYH16     | -0.27       | 2.39E-04 | 9.01E-04 |
| 97          | cg21776682 |           | 0.26        | 3.40E-04 | 1.23E-03 |
| 35          | cg21390682 | MCF2L     | 0.25        | 6.90E-04 | 2.42E-03 |
| 47          | cg04691233 | JAM3      | 0.24        | 1.08E-03 | 3.65E-03 |
| 48          | cg07500432 | PARD6G    | 0.24        | 1.15E-03 | 3.76E-03 |
| 9           | cg14429765 | MCPH1     | 0.23        | 1.90E-03 | 6.01E-03 |
| 57          | cg07421682 | PCSK6     | 0.22        | 3.27E-03 | 1.00E-02 |
| 85          | cg23236908 | FBXO34    | 0.22        | 3.65E-03 | 1.08E-02 |
| 81          | cg19671331 |           | -0.2        | 6.06E-03 | 1.75E-02 |
| 26          | cg26182253 |           | -0.2        | 6.45E-03 | 1.81E-02 |
| 63          | cg21375204 | CLIP2     | 0.2         | 8.15E-03 | 2.22E-02 |
| 66          | cg06168875 | NANOS3    | 0.19        | 1.10E-02 | 2.91E-02 |
| 61          | cg01936649 |           | 0.19        | 1.15E-02 | 2.97E-02 |

|    |            |                    |       |          |          |
|----|------------|--------------------|-------|----------|----------|
| 15 | cg21847368 | MCF2L              | 0.18  | 1.47E-02 | 3.69E-02 |
| 51 | cg12198176 | RTDR1              | 0.18  | 1.63E-02 | 3.99E-02 |
| 29 | cg16393877 |                    | 0.17  | 2.01E-02 | 4.76E-02 |
| 72 | cg07815131 |                    | -0.17 | 2.07E-02 | 4.76E-02 |
| 79 | cg00172872 |                    | -0.17 | 2.09E-02 | 4.76E-02 |
| 24 | cg27363226 | KHSRP              | -0.17 | 2.24E-02 | 4.99E-02 |
| 7  | cg14966346 | KLC1               | 0.17  | 2.61E-02 | 5.44E-02 |
| 46 | cg09942424 | MGAT5B             | 0.17  | 2.56E-02 | 5.44E-02 |
| 88 | cg16040341 | HOMER2             | 0.17  | 2.58E-02 | 5.44E-02 |
| 76 | cg09235936 | HDLBP              | 0.16  | 2.88E-02 | 5.88E-02 |
| 28 | cg14527262 | LOC100130872-SPON2 | 0.16  | 3.26E-02 | 6.52E-02 |
| 20 | cg21341878 | ZFYVE28            | 0.15  | 4.02E-02 | 7.88E-02 |
| 13 | cg23844013 | C8A                | 0.15  | 4.22E-02 | 8.11E-02 |
| 37 | cg20930320 | SORT1              | -0.15 | 4.53E-02 | 8.54E-02 |
| 18 | cg03445663 | HDLBP              | 0.14  | 5.52E-02 | 1.02E-01 |
| 55 | cg20011075 |                    | 0.14  | 6.32E-02 | 1.15E-01 |
| 64 | cg23203234 |                    | 0.13  | 8.72E-02 | 1.55E-01 |
| 96 | cg21399807 | EML6               | 0.13  | 9.39E-02 | 1.64E-01 |
| 71 | cg23996071 | HOOK1              | -0.12 | 1.04E-01 | 1.79E-01 |
| 34 | cg27608031 | ADAMTS18           | -0.12 | 1.15E-01 | 1.94E-01 |
| 2  | cg24803255 | RASA3              | -0.11 | 1.26E-01 | 2.09E-01 |
| 54 | cg11945824 | PRRT1              | -0.11 | 1.51E-01 | 2.47E-01 |
| 70 | cg22060153 | SNORD89            | 0.11  | 1.59E-01 | 2.55E-01 |
| 98 | cg26593722 | FBXO31             | -0.1  | 1.63E-01 | 2.58E-01 |
| 33 | cg21609813 | LGI3               | -0.1  | 1.72E-01 | 2.68E-01 |
| 91 | cg05374733 | PRICKLE1           | 0.1   | 1.82E-01 | 2.79E-01 |
| 19 | cg15079231 | VIPR1              | 0.09  | 2.08E-01 | 3.09E-01 |
| 44 | cg13280041 | NHSL1              | -0.09 | 2.08E-01 | 3.09E-01 |
| 94 | cg14905600 | PWWP2B             | 0.09  | 2.11E-01 | 3.09E-01 |
| 14 | cg26578910 | PRKD2              | -0.09 | 2.25E-01 | 3.24E-01 |
| 17 | cg10248981 | LHPP               | 0.09  | 2.31E-01 | 3.28E-01 |
| 99 | cg04543233 | PAX1               | 0.09  | 2.55E-01 | 3.57E-01 |
| 80 | cg07780199 | CRTC1              | -0.08 | 2.60E-01 | 3.59E-01 |
| 27 | cg14370653 |                    | 0.08  | 2.78E-01 | 3.78E-01 |
| 25 | cg02187259 | FAM49A             | 0.08  | 3.02E-01 | 4.03E-01 |
| 43 | cg25778661 |                    | -0.08 | 3.04E-01 | 4.03E-01 |
| 30 | cg26130533 | LOC100130872-SPON2 | -0.07 | 3.41E-01 | 4.46E-01 |
| 73 | cg05583087 |                    | 0.07  | 3.57E-01 | 4.60E-01 |
| 16 | cg03607729 | LCMT1              | -0.07 | 3.81E-01 | 4.85E-01 |
| 78 | cg27252696 | SIM1               | 0.06  | 3.90E-01 | 4.90E-01 |
| 52 | cg19643441 | SF4                | -0.06 | 4.04E-01 | 5.01E-01 |
| 5  | cg02857643 | CACNA1G            | 0.06  | 4.21E-01 | 5.16E-01 |



|    |            |          |       |          |          |
|----|------------|----------|-------|----------|----------|
| 56 | cg14752965 |          | 0.05  | 4.74E-01 | 5.73E-01 |
| 39 | cg13119928 | KRT79    | -0.05 | 5.01E-01 | 5.99E-01 |
| 10 | cg08602214 | RHOBTB2  | -0.05 | 5.21E-01 | 6.14E-01 |
| 58 | cg22697364 |          | 0.05  | 5.26E-01 | 6.14E-01 |
| 42 | cg09419102 |          | -0.04 | 5.69E-01 | 6.56E-01 |
| 3  | cg00903099 | HTR5A    | -0.04 | 5.86E-01 | 6.62E-01 |
| 82 | cg26925590 | C16orf35 | 0.04  | 5.88E-01 | 6.62E-01 |
| 11 | cg19735533 |          | 0.04  | 6.27E-01 | 6.98E-01 |
| 32 | cg03363012 | C20orf54 | -0.03 | 6.70E-01 | 7.30E-01 |
| 36 | cg27654476 |          | 0.03  | 6.79E-01 | 7.30E-01 |
| 38 | cg12864185 |          | -0.03 | 6.85E-01 | 7.30E-01 |
| 65 | cg04215055 | MGAT5B   | -0.03 | 6.64E-01 | 7.30E-01 |
| 68 | cg25900150 | ZC3H3    | 0.03  | 6.97E-01 | 7.34E-01 |
| 23 | cg27138871 |          | 0.02  | 8.29E-01 | 8.64E-01 |
| 1  | cg26173173 | GSDMD    | 0.01  | 8.55E-01 | 8.73E-01 |
| 60 | cg10622536 | C1orf113 | 0.01  | 8.48E-01 | 8.73E-01 |
| 45 | cg14772639 | SAP130   | -0.01 | 8.72E-01 | 8.81E-01 |
| 50 | cg21843517 | SNRNP35  | 0.01  | 8.92E-01 | 8.92E-01 |
| 40 | cg20681783 |          | NA    | NA       | NA       |
| 84 | cg17244485 |          | NA    | NA       | NA       |

---
